1 **Systems analysis of immune responses to attenuated *P. falciparum* malaria sporozoite**  
2 **vaccination reveals excessive inflammatory signatures correlating with impaired immunity**

3  
4 Ying Du<sup>1\*</sup>, Nina Hertoghs<sup>1\*</sup>, Fergal J. Duffy<sup>1</sup>, Jason Carnes<sup>1</sup>, Suzanne M. McDermott<sup>1</sup>, Maxwell L.  
5 Neal<sup>1</sup>, Katharine V. Schwedhelm<sup>2</sup>, M. Juliana McElrath<sup>2</sup>, Stephen C. De Rosa<sup>2</sup>, John D. Aitchison<sup>1</sup>,  
6 Kenneth D. Stuart<sup>1</sup>

7 1. Center for Global Infectious Disease Research, Seattle Children's Research Institute, Seattle,  
8 WA, United States

9 2. Vaccine and Infectious Disease Division, Fred Hutchinson Cancer Research Center, Seattle,  
10 WA 98109 USA

11

12 \* Contributed equally

13

14

15 **Abstract:**

16 Immunization with radiation-attenuated sporozoites (RAS) can confer sterilizing protection  
17 against malaria, although the mechanisms behind this protection are incompletely understood.  
18 We performed a systems biology analysis of samples from the Immunization by Mosquito with  
19 Radiation Attenuated Sporozoites (IMRAS) trial, which comprised *P. falciparum* RAS-immunized  
20 (*Pf*RAS), malaria-naïve participants whose protection from malaria infection was subsequently  
21 assessed by controlled human malaria infection (CHMI). Blood samples collected after initial  
22 *Pf*RAS immunization were analyzed to compare immune responses between protected and non-  
23 protected volunteers leveraging integrative analysis of whole blood RNA-seq, high parameter  
24 flow cytometry, and single cell CITEseq of PBMCs. This analysis revealed differences in early  
25 innate immune responses indicating divergent paths associated with protection. In particular,  
26 elevated levels of inflammatory responses early after the initial immunization were detrimental  
27 for the development of protective adaptive immunity. Specifically, non-classical monocytes and  
28 early type I interferon responses induced within 1 day of *Pf*RAS vaccination correlated with  
29 impaired immunity. Non-protected individuals also showed an increase in Th2 polarized T cell  
30 responses whereas we observed a trend towards increased Th1 and T-bet<sup>+</sup> CD8 T cell responses  
31 in protected individuals. Temporal differences in genes associated with natural killer cells suggest  
32 an important role in immune regulation by these cells. These findings give insight into the  
33 immune responses that confer protection against malaria and may guide further malaria vaccine  
34 development.

35

36

## 37 Introduction

38 Malaria is a devastating disease that results in over 200 million cases and hundreds of thousands  
39 of deaths annually. *Plasmodium falciparum* causes the most serious disease and the most deaths,  
40 especially in sub-Saharan Africa and primarily in children (Vekemans et al., 2021). Multi-pronged  
41 efforts to eliminate malaria have led to substantial reductions in malaria incidence but the  
42 development of drug and insecticide resistance as well as other factors, including the current  
43 COVID-19 pandemic, are a challenge to further progress (Vekemans et al., 2021; Weiss et al.,  
44 2021). An effective anti-malarial vaccine has been a long term goal which has proven challenging.  
45 Currently, a single approved malaria vaccine exists, the RTS,S subunit vaccine, which elicited 28-  
46 33% protection in infants over a 4-year study period (RTSS Clinical Trials Partnership, 2015). An  
47 improved vaccine, especially one that prevents infection, would be a valuable tool in the effort  
48 to eliminate this disease. Understanding the immune responses that contribute to vaccine  
49 induced immune protection could aid the development of such vaccines.

50  
51 Sporozoites (SPZs) are the liver-infectious life cycle stage of malaria, injected via mosquito bite in  
52 natural infections. Many studies in humans and model systems have shown that vaccination with  
53 *P. falciparum* SPZs that have been attenuated by radiation, genetic modification, or drug  
54 treatment can result in sterilizing immunity, as determined by subsequent controlled human  
55 malaria infection (CHMI) (Coelho et al., 2017; Obeng-Adjei et al., 2015; Portugal et al., 2015,  
56 2014). This mode of vaccination aims to elicit immunity against pre-erythrocytic parasite stages,  
57 where the biomass of the parasites is low and the infection is asymptomatic. Currently, no  
58 universal correlates of protection have been identified and the nature of protective immunity is  
59 incompletely understood. Sterilizing immunity is likely to be complex and directed at multiple  
60 antigens given that the *P. falciparum* genome encodes more than 5,300 unique proteins.  
61 Available evidence indicates that antibodies against major surface proteins of infecting SPZs, e.g.  
62 CSP and TRAP, contribute to protection (Ishizuka et al., 2016; Seder et al., 2013). Animal models  
63 have indicated that liver-resident CD8 T cell responses are important for protection, which is  
64 inherently challenging to study in humans, as the human liver is not readily accessible for  
65 sampling and a very small fraction of its cells get infected (Fernandez-Ruiz et al., 2016b; Trieu et  
66 al., 2011). It is imperative to identify correlates of protection in humans that can aid the  
67 improvement of the current vaccines and development of vaccine candidates. To this end, human  
68 vaccination and challenge trials with attenuated *Pf*SPZs provide an opportunity to elucidate  
69 immune responses that are associated with pre-erythrocytic protection.

70  
71 In this study, we applied a systems immunology approach to identify correlates of protection that  
72 are identifiable up to 28 days after initial vaccination in malaria naïve human trial subjects that  
73 participated in the Immunization by Mosquito with Radiation Attenuated Sporozoites (IMRAS)  
74 trial (Hickey et al., 2020). Participants were immunized by *Pf*RAS delivered by mosquito bite with

75 efficacy assessed by CHMI. Five total immunizations were delivered, spaced 4 to 5 weeks apart.  
76 The trial was designed with a suboptimal vaccine dose regime to elicit approximately 50% vaccine  
77 efficacy to facilitate comparison between protected (P) and non-protected (NP) subjects. Of  
78 particular interest in the IMRAS trial is the prime vaccination. IMRAS participants are malaria  
79 unexposed, and the initial *Pf*RAS vaccination represents the first time their immune system has  
80 been exposed to *P. falciparum* sporozoites. We hypothesized that the earliest immune responses  
81 to *Pf*RAS represent a critical time period determining subsequent development of sterilizing  
82 immunity.

83  
84 Our integrative analysis of whole blood transcriptomics, high parameter flow cytometry and  
85 single cell CITE-seq identified numerous vaccine-induced responses including ones that  
86 correlated with protection. We observed strong negative correlations with protection that were  
87 associated with inflammation, type I interferon (IFN), and signatures related to monocytes and  
88 neutrophils, and type 2 polarized T helper cell responses. Differential kinetics in natural killer (NK)  
89 cell-associated responses and a trend of increased T-helper 1 cells correlated positively with  
90 protection. These results suggest that the priming vaccination with radiation attenuated *Pf*SPZs  
91 establishes immunological trajectories that can result in protection following additional  
92 vaccinations, and show that early inflammatory responses can negatively influence the fate of  
93 protective immunity.

94

## 95 **Results**

96 The IMRAS cohort analyzed consisted of eleven malaria-naïve adults immunized with five doses  
97 of approximately 200 bites from *Pf*RAS NF54 infected mosquitos (Hickey et al., 2020). The first  
98 four doses were given four weeks apart and the final dose was administered five weeks after the  
99 fourth. Protection was tested by controlled human malaria infection (CHMI) three weeks after  
100 the final vaccination (Fig. S1 A). Six of the eleven immunized participants were protected, i.e. zero  
101 parasitemia after CHMI. Of the five non-protected subjects one developed parasitemia on day 9  
102 after CHMI and four did so on day 13 after CHMI (Fig. S1 B). There was no significant correlation  
103 between the number of *Pf*RAS infectious mosquito bites received and protection status among  
104 true-immunized subjects (Fig. S1 C).

105

### 106 ***Pf*SPZ vaccination induced broad transcriptome responses**

107 Whole blood transcriptome profiling was performed on all eleven immunized IMRAS participants  
108 at 6 timepoints after the initial *Pf*RAS vaccination. We examined transcriptional changes between  
109 adjacent timepoints, which we refer to as time “intervals”, namely between days 0-1, 1-3, 3-7, 7-  
110 14, and 14-28 after immunization. We conducted linear mixed-effects regression modeling  
111 analysis (LMER) of the responses to identify significantly responsive genes over all subjects and  
112 those that differed between P and NP at each interval (FDR < 0.2 & p < 0.05; see Materials and

113 Methods). 90% confidence intervals (CIs) were calculated around model coefficients to label  
114 genes as either increased or decreased if the CI was entirely above or below 0, respectively (Fig.  
115 1A). Many significantly responsive genes were observed after the first *Pf*SPZ vaccination; 8170  
116 genes had increased or decreased expression responses over at least at one interval across all  
117 immunized subjects and approximately 10% of these differed significantly between P and NP  
118 subjects (Fig. 1A).

119  
120 The association between vaccine induced gene responses and specific cell populations and  
121 immunological processes was determined by testing whether pre-defined coherent blood  
122 transcription module sets (BTMs) (Chaussabel et al., 2008a; Li et al., 2014a; Liberzon et al., 2015)  
123 showed enrichment for significantly responsive genes (hypergeometric  $p < 0.1$ ). We identified  
124 122 BTMs significantly enriched in response genes in at least one time interval. Hierarchical  
125 clustering of enriched BTM hypergeometric effect sizes at each interval revealed discrete time-  
126 dependent response patterns among the immunized subjects (Fig. 1 B). BTMs increased during  
127 the first day after vaccination were associated broadly with immunity and inflammation,  
128 including TLR sensing; antigen processing; interferon and inflammation; monocytes and  
129 neutrophils. This was accompanied by decreases in BTMs associated with the cell cycle and T  
130 cells. Relatively few enriched BTMs were observed between day 1 and 3. Over subsequent  
131 intervals (D3-7, D7-14, D14-28) BTMs associated with monocytes, neutrophils, TLR sensing,  
132 inflammation and interferon, decreased sharply. However, we observed an increase in cell cycle-  
133 associated responses from D3-7, and an induction of T cell associated BTMs at D14-28. Overall,  
134 the priming vaccination resulted in robust and dynamic transcriptional responses in the  
135 combined group of P and NP subjects.

### 136 137 ***Protection associated genes showed distinct response dynamics in P and NP individuals***

138 To further explore response dynamics of protection-associated genes, we performed  
139 unsupervised clustering of the responses over time of the 1394 genes that were differentially  
140 expressed between P and NP ( $FDR < 1/3$  &  $p < 0.05$ , Fig.2 A; Materials and Methods). Hierarchical  
141 clustering was performed separately for P and NP subjects to illustrate the response differences  
142 between these two groups and to identify sets of genes with coherent response profiles over  
143 time following *Pf*SPZ immunization (Fig. 2 A,C). Immune functions and molecular mechanisms  
144 associated with these clusters were identified by the hypergeometric enrichment test using BTMs  
145 and by Ingenuity Pathway Analysis (IPA) (see Materials and Methods) (Fig. 2 B,D, Fig. S4). We  
146 identified four major gene clusters for P subjects (P\_1, P\_2, P\_3, P\_4) and five for NP subjects  
147 (NP\_1, NP\_2, NP\_3, NP\_4, NP\_5). The patterns in which these 1394 genes changed over time  
148 differed between P and NP, leading to substantial differences in gene composition of most of the  
149 major P and NP clusters (Fig.2 A,C,E). A total of 39 significantly enriched BTMs and 159 significant  
150 IPA pathways were identified between P and NP (Table S1).

151

152 Most gene clusters from both P and NP were strongly enriched for cell cycle-associated BTMs  
153 (Fig.2 B,D). An important exception was P\_1 and NP\_1, both were associated primarily with  
154 various immune response modules including many type I IFN-associated modules. These two  
155 gene clusters have the largest total numbers of genes and associated BTMs. In total, P\_1 and  
156 NP\_1 have 317 genes in common (hypergeometric  $p = 4.2e-17$ ) (Fig. 2 E), although numbers of  
157 enriched modules and gene expression dynamics are distinct (Fig. S2 A-C). Expression of most  
158 genes in these clusters was increased over the interval D0-1, with higher response magnitude in  
159 NP\_1 (Fig. S2 C). Consistent with strong enrichment of type I IFN associated modules in P and NP-  
160 associated cluster 1, we observed that IFN-stimulated genes (ISGs) were strongly increased  
161 overall in NP compared with P and NP by day 1 after the first vaccination (Fig.2 F, Mann Whitney  
162 U test,  $P < NP$ ,  $p < 2.2e-16$ ) (Kazmin et al., 2017). Furthermore, we observed significantly increased  
163 expression of genes related to sensing through Pattern Recognition Receptors (PRR) in NP  
164 participants by day 1, for both MyD88 dependent and independent pathways (Fig. S3 A-C).  
165 Altogether, these patterns indicate that overall innate sensing and inflammatory responses were  
166 highly elevated in NP compared to P subjects, strongly suggesting that they negatively affected  
167 the induction of adaptive immunity against SPZ challenge.

#### 168 ***Gene set enrichment analysis identified early inflammation as correlate of impaired immunity***

169 To more broadly explore immunological processes and cell types associated with protection we  
170 performed gene set enrichment analysis (GSEA) separately for P and NP subjects at each time  
171 interval (Fig. 3 A). GSEA facilitated identifying important coherent response modules that our  
172 above analysis based on differentially expressed genes may not have revealed. GSEA revealed 80  
173 BTMs significantly enriched at 1 or more timepoints (FDR < 0.1). Twenty of these BTMs  
174 overlapped with the 39 BTMs enriched in differentially expressed genes.

175 Patterns of responses over time differed between P and NP. Two modules showed opposite  
176 responses: *M4.0 cell cycle transcription* over day 0-1, and *M196 platelet activation + actin binding*  
177 over day 3-7 were both increased in P and decreased in NP. Hierarchical clustering of the GSEA  
178 BTM normalized enrichment scores (NESs) identified four major clusters of BTMs (Fig. 3 A) and  
179 many of the BTMs within a cluster shared genes (Fig. 3 B). GSEA cluster 1 is associated with B and  
180 T cells, cluster 2 with cell cycle and potentially cell proliferation, cluster 3 with NK cells, and  
181 cluster 4 with monocytes, neutrophils and immune activation.

182 Cluster 1 contained BTMs associated with T and B cells. These BTMs decreased over day 0-1  
183 specifically in NP, with most BTMs remaining unchanged at all other time intervals for both P and  
184 NP. BTMs in cluster 2 were generally associated with cell cycle and division. These BTMs were  
185 downregulated over day 0-1 and day 7-14 and upregulated from day 3-7 in both P and NP.  
186 Notably, most of these BTMs were activated in NP but not in P from day 3-7. Cluster 3 was the  
187 most heterogeneous cluster in terms of composition and time dynamics, and included NK cell,

188 plasma cell and transcriptional regulatory BTMs among others. These modules tended to be  
189 increased at early time intervals, before decreasing at day 7-14 and day 14-28. Notably, NK BTMs  
190 were upregulated in P over day 0-1; however, their activation occurred late in NP over day 1-3  
191 and day 3-7. Cluster 4 primarily represented innate inflammation, interferon, monocytes,  
192 neutrophils and dendritic cell BTMs. Consistent with our above gene-based analysis, cluster 4  
193 responses in NP individuals increased sharply at day 0-1 and day 7-14 with an intermediate  
194 decrease from day 3-7, with relatively few changes in P individuals over the first four time  
195 intervals. Both P and NP individuals showed decreased responses in cluster 4 BTMs day 14-28.  
196 Cluster 4 also included platelet BTMs, and early activation of platelets in NP may reflect their  
197 influence on the elevated expression associated with immune activation and monocytes (Rolfes  
198 et al., 2019). Activated neutrophils produce reactive oxygen species (ROS), and we observed an  
199 increase in ROS signalling in NP (Fig. S5 A-C) at day 0-1. The differences between P and NP subjects  
200 in this cluster highlights the greater magnitude of inflammatory responses by innate cells in NP  
201 versus P subjects early after the first immunization. Overall, this analysis supports our hypothesis  
202 that high levels of inflammatory responses and type I IFN are detrimental for protective  
203 immunity, and suggests these responses are associated with monocytes, DCs and NK cells.

204

#### 205 ***Specific Immune cell types associated with protection by transcriptomics and flow cytometry***

206 GSEA and differential gene expression analyses indicated that specific immune associated  
207 transcriptional responses were induced at different times and to different extents between P and  
208 NP subjects. This suggests that specific immune cell populations responded differently in P vs NP,  
209 thus, we further investigated whether a cell type-specific signature could be identified after initial  
210 *Pf*RAS immunization.

211

212 We generated heatmaps of expression changes by averaging expression of genes from significant  
213 cell-type associated BTMs identified by the GSEA analysis (Fig. 4 A,B, Fig. S6 A-G). Monocytes,  
214 DCs, neutrophils and platelet-associated responses were highly increased in NP over day 0-1,  
215 indicating strong innate immune responses in NP that were absent or significantly lower in P  
216 subjects (Fig. 4 A,B, Fig. S6 A-D). In contrast, genes associated with T and B cells were strongly  
217 decreased over day 0-1 in NP subjects (Fig. 4 A, Fig. S6 E-F). Both P and NP subjects had a modest  
218 increase in B cell associated genes in the last time interval (Fig. S6 F). Interestingly, P and NP  
219 subjects differed in the timing, magnitude and nature of active NK cell-related genes (Fig. 4 A).  
220 Once again, these results indicate that early innate immune activation strongly correlates with  
221 insufficient immunity to challenge after the completion of the vaccine regimen and  
222 transcriptome responses associated with adaptive cell types show the opposite expression  
223 pattern.

224

225 To validate this whole blood transcriptional analysis, we applied high parameter flow cytometry  
226 to characterize PBMCs isolated from immunized individuals after the first immunization. This was  
227 done at overlapping time points with the whole blood transcriptional analyses, although we  
228 lacked matching PBMC samples for the 1 day and 28 days post immunization timepoints (Table  
229 S2, Fig.5 A-G). We assessed whether transcriptional responses associated with specific cell types  
230 were correlated with flow cytometry derived counts of the appropriate populations.

231  
232 Consistent with the RNAseq data, NP subjects showed a trend towards increased numbers of  
233 circulating monocytes shortly after the first immunization, specifically non-classical monocytes  
234 (CD14<sup>+</sup>-CD16<sup>+</sup>) (Fig5A,  $p = 0.06$ ). These inflammatory cells have been implicated in several  
235 vaccination studies to be correlated with impaired immunity (George et al., 2018; Mitchell et al.,  
236 2012). We also observed increased numbers of ILT3<sup>+</sup> monocytes, associated with IFN exposure  
237 (Jensen et al., 2010; Waschbisch et al., 2014), after the first vaccination (Fig.5 A,  $p = 0.0004$ ).  
238 Furthermore, by applying a previously identified transcriptional signature of macrophage  
239 polarization (Becker et al., 2015), we observed that responses associated with classically  
240 activated macrophages were specifically increased in NP between day 0-1, but no change was  
241 observed for alternatively activated macrophage responses (Fig S6 H,I). We compared the  
242 abundance and activation status of several DC subsets between P and NP subjects and found  
243 several trends that were consistent with RNA-seq results, albeit not statistically significant (Fig. 5  
244 E). We observed a subtle increase in plasmacytoid DCs, and overall increased CD11c<sup>+</sup> DC numbers  
245 3 days after the first immunization in NP compared to P subjects (Fig. 5 B). Interestingly, the  
246 proportion of “mature” CD1c<sup>+</sup> DCs expressing CD86 was higher in P than NP subjects whereas  
247 CD86 expressing CD11c<sup>+</sup> DCs that lack CD1c or CD141 expression, and non-activated CD1c DCs  
248 were enriched in NP subjects. These findings suggest that CD11c<sup>+</sup> DCs, non-activated CD1c<sup>+</sup> DCs  
249 and non-classical monocytes contribute to the transcriptional signature in NP subjects where we  
250 observed an increase in DC and monocyte-associated genes (Fig.5 B, Fig. 4 A, Fig. S6 B,H,I).  
251 Because different types of DCs can activate and skew different T-helper cell responses, we also  
252 assessed the proportion of Th1 and Th2 CD4<sup>+</sup> T cells (Collin and Bigley, 2018) and observed  
253 greater proportions of Th2 CD4 T cells in NP, and a trend towards more Th1 cells in P subjects  
254 (Fig. 5C). In addition, we found a trend of higher circulating numbers of CD8 T cells and T-bet  
255 expressing CD8 T cells in P subjects. In CD8 T cells, T-bet is an important transcription factor that  
256 is involved in memory cell formation (Sullivan et al., 2003). These data suggest that differences  
257 in innate responses contributed to impaired protective immunity by skewing the CD4 T cells  
258 toward a type 2 phenotype, and protective responses are hallmarked by Th1 and CD8 T cell  
259 responses. The abundance of the NK cells in general, and CD38 expressing NK cells matched the  
260 transcriptome responses in which NK-associated gene increases peaked at day 1-3 in P subjects  
261 and day 7 in NP subjects (Fig. 5D). However CD8-expressing NK cells subsets did not show any  
262 early peak in P participants. Notably, CD8<sup>+</sup> NK cells lacking FcR $\gamma$  were more abundant in NP

263 subjects across all measured timepoints (Hart et al., 2019; Hwang et al., 2012; McKinney et al.,  
264 2021; Zambello et al., 2020).

265

266 To quantify the relationships between the transcriptional and cytometric data, we performed  
267 correlation analysis of temporal changes of BTMs and cell subsets from manually gated flow  
268 cytometry data (Fig. 6 A). These analyses showed that transcriptional activation of the innate  
269 immune response (inflammatory responses, monocyte signatures, DC signatures, viral sensing &  
270 immunity, antigen processing & presentation, etc.) positively correlated with increases in the  
271 proportion of innate immune cells (DCs, monocytes) (Fig. 6 B). In contrast, transcriptional down-  
272 regulation of T cell-related responses (T cell activation, T cell differentiation) paralleled cellular  
273 decreases of CD3 T cells (Fig.6B), and transcriptional activation of several NK-associated genes  
274 positively correlated with increases in NK cells (Fig. 6 B). The activation of innate immune  
275 responses (increases in BTMs related to monocytes, DCs, inflammatory responses) in NP subjects  
276 correlated with decreases in total T cell counts (Fig. 6 C). The down-regulation of T cell modules  
277 (T cell activation, T cell differentiation) was associated with increases in the abundance of DCs  
278 and monocytes (Fig. 6 C). Additionally, the downregulation of B cell-associated genes was  
279 correlated with cell composition increases in NKT-like cells that co-express CD3 and CD56 (Fig. 6  
280 C). These analyses indicate that the transcriptional data and the flow cytometry data align  
281 consistently and reveal cell abundance and activation changes that correlate with each other.

282

### 283 ***RNAseq and flow cytometry findings were further validated with scRNAseq***

284 To further validate the identity of cell subsets indicated by transcriptional analysis, we performed  
285 CITEseq with a panel of 14 antibodies using PBMC samples collected on day 0, day 3 and day 14  
286 after the priming dose of *Pf*SPZ from an IMRAS subject who dropped out of the trial (Table S3).  
287 We obtained single cell RNA seq gene expression and surface protein marker profile data from a  
288 total of 12,442 cells. Mapping of these cells to a previously defined multimodal cell atlas based  
289 on reference clusters identified 29 cell types in the merged samples (Fig. 7 A) (Hao et al., 2021).  
290 We then derived transcriptional cell-type associated signatures using genes highly expressed in  
291 CITEseq-identified cell types in our samples, and applied these signatures in GSEA analysis of the  
292 whole blood RNA-seq data (Fig. 7 B). Consistent with previous BTM-based GSEA analyses, GSEA  
293 with our CITEseq signatures indicated that CD14+ and CD16+ monocyte subsets were highly  
294 activated on day 1 in NP subjects. By contrast, genes associated with NK cells were highly  
295 activated on day 1 in P subjects, whereas the activation continued on day 3 in NP subjects (Fig. 7  
296 B,C). Finally, comprehensive correlation analysis was performed to examine the relationship  
297 between cell subsets predicted by CITEseq and cell-specific BTMs identified in our previous GSEA  
298 (Fig. 3, Fig. 4). The high correlation between cell-specific BTMs and corresponding cell types  
299 identified in CITEseq data demonstrates that the cell subsets identified by both approaches are  
300 consistent (Fig. 7 D) and supports our interpretation of these responses. Thus, integration of



301 whole blood RNA-seq, high parameter flow cytometry and scRNA-seq of individuals after initial  
302 *Pf*RAS vaccination revealed a consistent picture where inflammatory transcripts and non-classical  
303 monocytes, and Th2 signalling are specifically increased in NP individuals in the first day after  
304 *Pf*RAS vaccination while P individuals are marked by increased early NK-cell and Th1 signalling.  
305

306 **Discussion**

307 Whole blood transcriptome, high parameter flow cytometry and CITEseq systems analyses of the  
308 IMRAS trial identified numerous responses to the first vaccination, including early inflammatory  
309 responses correlated with a lack of protection. These early inflammatory responses were  
310 associated with myeloid cells, including neutrophils and increased levels of monocyte and DC  
311 subsets, and Th2 cells. This substantial early inflammatory stimulation may have resulted in  
312 skewing toward a type 2 response. In contrast, effective protection was correlated with early  
313 responses associated with NK cells, later responses associated with T cells and lower overall  
314 responses. These results underscore the influence of early innate and adaptive responses on the  
315 subsequent immunological trajectories as shown by different response profiles that do or do not  
316 ultimately lead to protection from infection (Figs. 2,3). We hypothesize that differential priming  
317 of the adaptive compartment by PfrAS vaccinations impacts subsequent responses and  
318 ultimately protection from infection by protected vs not protected vaccinees. Thus, immune  
319 responses to the first vaccination may be decisive for the outcomes of vaccinations with  
320 attenuated sporozoites and may provide early biomarkers of protection.

321 Myeloid cell activation as a negative correlate of protection may seem counterintuitive since  
322 activation is required for antigen presenting cell (APC) priming of adaptive T cell responses in  
323 lymphoid tissues. The higher levels of inflammatory responses that we found to correlate with a  
324 lack of protection in this study imply that over-induction of inflammation negatively impacted  
325 the development of protective adaptive responses. Previously, innate pathways that suppress  
326 adaptive responses have been identified in the context of immune pathology (Minkah et al.,  
327 2019; Wherry et al., 2007). Similarly, the early increase in neutrophil-associated gene expression  
328 following vaccination correlated with a lack of protection. Although neutrophils are rapid innate  
329 responders to infection and function in pathogen clearance and immune modulation (Mantovani  
330 et al., 2011), a subset of neutrophils that are systemically induced upon acute inflammation  
331 suppress T cell responses through ROS production (Kusmartsev et al., 2004; Pillay et al., 2012;  
332 Zemans, 2018). The increased expression of transcripts associated with ROS production observed  
333 in NP subjects implies that neutrophil suppression of T cell responses may also have negatively  
334 impacted development of protective adaptive immune responses after PfrAS vaccination.

335  
336 Innate priming of naïve T cells into various T-helper cells can occur through the actions of  
337 neutrophils and basophils, DC subsets via their intrinsic properties or their interplay with other  
338 innate cells, including the induction of Th2 cells in response to type 2 innate lymphoid cell (ILC2)-  
339 derived cytokines (Kim and Kim, 2018; Otsuka et al., 2013; Phythian-Adams et al., 2010; Tang et  
340 al., 2010; Tjota and Sperling, 2014). The reciprocal early relative increase in Th2 cells and  
341 decrease in Th1 cells in NP subjects only implies that inhibition of polarization of Th1 cells by Th2  
342 cytokines suppressed development of responses that protect against CHMI (Kim and Kim, 2018).  
343 We also observed a trend towards higher numbers of Th1 and CD8 T cells in P vs NP subjects at

344 early timepoints, suggesting that Th1 responses contribute to PfRAS vaccination-induced  
345 immunity. This is consistent with studies in animal models which concluded that sterilizing  
346 protection involves Th1 cells which secrete IFN $\gamma$  and, in co-ordination with with macrophages  
347 and liver resident cytotoxic CD8 T cells, eliminate intracellular pathogens (Cockburn et al., 2013;  
348 Fernandez-Ruiz et al., 2016a; Hickey et al., 2020; McNamara et al., 2017; Tse et al., 2014)(Perez-  
349 Mazliah and Langhorne, 2014). In addition, the correlation of CSP-specific, IFN $\gamma$ -producing CD4 T  
350 cells with protection from infection following RTS,S/AS02 vaccination (Reece et al., 2004) also  
351 suggests that Th1 cells can contribute protective immunity in humans.

352  
353 Increases in monocyte associated transcriptome responses and of non-classical and ILT3-  
354 expressing monocytes in NP subjects suggest that these responses impair development of  
355 protection following Pf vaccination. Impairment of vaccine elicited immunity has been linked to  
356 non-classical or inflammatory monocytes in mice (George et al., 2018; Li et al., 2013; Mitchell et  
357 al., 2012) perhaps involving ILT3 monocyte recruitment to lymph nodes and interference with T  
358 cell priming as implied by the enhanced T cell priming following monocyte depletion. GM-CSF  
359 production by monocytes and sequestration of cysteine have been suggested as mechanisms of  
360 T cell suppression during priming (Mitchell et al., 2012; Serafini et al., 2004). The correlation  
361 between type I IFN expression and the lack of protection that observed in this work (Fig 2F) and  
362 in a vaccine trial of malaria SPZs given under chemoprophylaxis cover (Tran et al., 2019) indicates  
363 that these responses can hamper the development of adaptive responses. That ILT3 surface  
364 expression by monocytes can result from type I IFN stimulation (Jensen et al., 2010; Waschbisch  
365 et al., 2014) and both type I IFN and ISGs increased expression in NP subjects early after  
366 vaccination suggests that the monocytes in NP subjects have encountered type I IFN stimulation.  
367 Type I IFNs are potent immune mediators that can directly activate DCs, NK cells and T and B cells  
368 and regulate immune responses to many pathogens. These IFNs signal through the interferon  
369 alpha receptor (IFNAR) that is present on almost all cells in the body and induce ISGs that function  
370 in the control of infection. However, type I IFN has also been linked to immune pathology in  
371 chronic viral diseases and in some bacterial infections (McNab et al., 2015). The ultimate  
372 protective vs non protective effects of the type I IFN response may well depend on its timing,  
373 localization and magnitude of the specific IFN responses as has been suggested (Nagai et al.,  
374 2003).

375  
376 Protection elicited by vaccination with radiation attenuated SPZs requires an abortive liver  
377 infection (Doolan and Hoffman, 2000). Infection studies in animals have shown that malaria  
378 infected hepatocytes produce type I IFN, and IFN $\gamma$ -secreting NK and NKT cells are recruited as  
379 liver stage parasites are eliminated (Miller et al., 2014). However, type I IFN responses are also  
380 detrimental to long term immunity against infection (Liehl et al., 2015, 2014; Miller et al., 2014;  
381 Minkah et al., 2019). Caspase-mediated cell death of infected hepatocytes is required for the

382 uptake and presentation of malaria antigens by innate phagocytic cells (Kaushansky et al., 2013;  
383 Kurup et al., 2019; Marques-Da-Silva et al., 2021) but type I IFN can inhibit caspase activity and  
384 inflammasome activation thus potentially inhibiting the presentation of malaria antigens (Guarda  
385 et al., 2011; Veeranki et al., 2011). IFNAR signaling during malaria liver infection may also impair  
386 the induction of Th1 and CD8 T cell responses and enhance exhaustion of liver resident CD8 T  
387 cells (Haque et al., 2014; Minkah et al., 2019; Nagai et al., 2003). In addition, type I IFN can  
388 hamper protective immunity via inhibition of IFN $\gamma$  responsiveness by monocytes and  
389 macrophages that in turn can limit the induction of Th1 responses (de Paus et al., 2013;  
390 Rayamajhi et al., 2010). Overall IFN $\gamma$  is an important mediator in anti-malarial immunity with a  
391 variety of downstream effects besides macrophage activation (King and Lamb, 2015). We did not  
392 find that the best known and potent producers of large quantities of type I IFN, namely  
393 plasmacytoid DCs (pDCs), had significantly higher levels of in NP subjects; however, other innate  
394 cells, e.g. neutrophils, monocytes and DCs can secrete type I IFN (Ali et al., 2019; Rocha et al.,  
395 2015).

396  
397 NK cell-associated transcriptome responses (Figs 3A and 4A) and relative changes in NK cell  
398 subset numbers (Fig 6B) occur earlier in P than in NP subjects, which may indicate that they  
399 contribute to the development of immunity, perhaps via the balance between Th1 and Th2  
400 responses. NK cells can be activated by neutrophils as well as inflammatory monocytes through  
401 type I IFN (Costantini and Cassatella, 2011; Lee et al., 2017) and they can have diverse functions.  
402 They can act as immune regulators that enhance or suppress adaptive responses and they can  
403 be innate effectors that rapidly respond to and eliminate infected or tumor cells (Schuster et al.,  
404 2016; Vivier et al., 2008). IFN $\gamma$  secretion by NK cells can support DC-mediated Th1 induction  
405 (Schuster et al., 2016; Zhao et al., 2020), analogous to that we observed in P subjects, but NK cells  
406 can also limit adaptive responses by suppressing DCs, CD4 T cells and B cells and thus variably  
407 impact outcomes (Hayakawa et al., 2004; Piccioli et al., 2002; Zhang et al., 2013; Zhao et al.,  
408 2020). Furthermore, NK cells can reduce inflammation, e.g. as with COVID-19 related immune  
409 pathology (Li et al., 2020; Mehta et al., 2020; van Eeden et al., 2020; Zheng et al., 2020). Thus,  
410 the early NK responses in P subjects may support the priming of a Th1 polarized response and  
411 inhibit inflammation that in NP subjects primes a Th2 response. Interestingly, we identified a  
412 novel NK cell subset that expressed CD8 and lacked FcR $\gamma$  expression and which is more abundant  
413 in NP subjects in the day 3-7 interval (Fig. 5D). FcR $\gamma$ -lacking NKs have previously been associated  
414 with an adaptive phenotype that is protective against seasonal malaria infection (Hart et al.,  
415 2019). Further investigations into this phenotype could elucidate its functionality.

416  
417 Overall, our analyses indicate that early innate responses to live irradiation attenuated SPZ  
418 vaccination substantially impact the development of adaptive responses and ultimately  
419 protection from malaria infection. Understanding mechanisms of protection is complicated by

420 the likelihood that protective effector processes are multi-functional, due to the large breadth of  
421 potential antigens, and protection may occur at multiple points between the introduction of SPZs  
422 and the establishment of a blood stage infection. Both antibody and cellular mediated  
423 mechanisms may contribute to protection: monoclonal antibodies derived from attenuated SPZ  
424 vaccination can protect humanized mice although antibody levels variably correlate with  
425 protection (Epstein et al., 2017; Hickey et al., 2020) and liver resident CD8+ T-cells and IFN $\gamma$   
426 correlate with protection in non-human primates (Pichyangkul et al., 2017). The complex balance  
427 of responses associated with protection are illustrated here by the differential early inflammatory  
428 responses between P and NP subjects and the potential effects on Th1 and Th2 responses. The  
429 events following the priming vaccination that correlated with protection are early NK associated  
430 responses in the context of limited inflammatory responses followed by CD4+ T cell responses  
431 and subsequently CD8+ T cell responses.

432  
433 That this study was performed on blood samples, despite decisive immune events occurring in the  
434 liver, which is essentially experimentally inaccessible, limited us to indirect analysis of phenotypic  
435 differences between the P and NP subjects rather than functional assays. The sample size is  
436 relatively small, which reduced our sensitivity to discover more subtle changes associated with  
437 protection, especially given natural variation in the participants. However, the detection of  
438 robust correlates of protection despite the low numbers increases our confidence that we have  
439 identified meaningful responses. These findings can inform further studies to extend the  
440 understanding of protective immunity and its development. In addition, multiple factors may  
441 have influenced the differences that between P and NP subjects that we described here, and  
442 which influenced protection. These include intrinsic differences between subjects, such as HLA  
443 type and other genetic differences as well as baseline immune status at the time of immunization.  
444 Also vaccination via infected mosquito bites may have contributed to variability in the effective  
445 vaccine dose received by each participant, i.e. the number of liver cells infected by live  
446 attenuated SPZs. In addition, the point at which parasite development in the liver cells was  
447 arrested may have been variable since radiation damage is random which may have impacted  
448 the amount and type of parasite antigen available for presentation.

449  
450 In conclusion, we show that a strong acute inflammatory response to a priming vaccination  
451 correlates with the ultimate lack of protection in this trial of malaria naive volunteers. We  
452 hypothesize that this results in skewing adaptive responses toward Th2-centered responses  
453 rather than protective Th1 responses and that this similarly impacts responses to subsequent  
454 immunizations. Thus, immune responses to the first vaccination can be decisive for the outcome  
455 of the trial.

456

457

## 458 **Materials and Methods**

459

### 460 **Sample collection and RNA sequencing**

461 Whole blood was collected from IMRAS trial participants directly into PAXgene blood RNA tubes  
462 (PreAnalytiX, Hombrechtikon, Switzerland) and stored at  $-20^{\circ}\text{C}$ . RNA extraction and globin  
463 transcript depletion (GlobinClear, ThermoFisher Scientific, MA, USA) were performed prior to  
464 cDNA library preparation using the Illumina TruSeq Stranded mRNA sample preparation kit  
465 (Illumina, CA, USA). Globin transcript depletion, cDNA library preparation and RNA sequencing  
466 were performed by Beijing Genomics Institute (Shenzhen, China). A total of sixty-six RNA-seq  
467 samples were sequenced, with a target depth of 30 million reads per sample. Eleven of the  
468 samples were sequenced on Illumina (San Diego, CA) HiSeq2000 sequencers using 75 base-pair  
469 (bp) paired-end reads. The remaining one hundred and eighty-six samples were sequenced on  
470 BGI500 sequencers using 100 bp paired-end reads.

471

### 472 **Quality control and processing of RNA-Seq data**

473 RNA-seq data were processed as previously described (Thompson et al., 2017). Read pairs were  
474 adjusted to set base calls with phred scores  $< 5$  to 'N'. Read pairs for which either end had fewer  
475 than 30 unambiguous base calls were removed, a method that indirectly removes pairs  
476 containing mostly adaptor sequences. Read pairs were aligned to the human genome (hg19)  
477 using STAR (v2.3.1d) (Dobin et al., 2013). Gene count tables were generated using htseq (v. 0.6.0)  
478 with the intersection-strict setting on and Ensembl gene annotations (GRCh37.74) used to link  
479 genomic locations to gene identifiers (Anders et al., 2015). Log<sub>2</sub>-transformed TMM-normalized  
480 counts-per-million (CPM) expression matrices were computed using the cpm function of the  
481 edgeR package (McCarthy et al., 2012). Batch correction for sequencer model (HiSeq2000vs  
482 BGI5000) was performed on log<sub>2</sub>-transformed counts using linear mixed-effects models with  
483 normally distributed errors and an unstructured covariance matrix. Mixed-effects models were  
484 fit using the R (<https://www.r-project.org/>) lme4 package (Bates et al., 2015). The following  
485 formula was used:

486

487  $\text{EXPRESSION} = \text{SEQUENCER} + (1 | \text{PARTICIPANT})$

488

489 in which EXPRESSION represents the log<sub>2</sub>-transformed CPM value, SEQUENCER the sequencing  
490 platform, and including random intercepts for each PARTICIPANT. To create a final batch-  
491 corrected expression matrix, raw CPMs were adjusted by subtracting the fitted SEQUENCER  
492 coefficient.

493

494 **Mixed-effects modeling to identify transcriptional signatures that were regulated by the**  
495 **primary vaccine and responded differentially in protected and non-protected immunized**  
496 **participants**

497 Linear mixed-effects regression models (LMER) were used to model individual gene expression  
498 (EXPRESSION) as a function of sample collection time (TIME) and protection after CHMI  
499 (PROTECTION), with TIME and EXPRESSION as fixed effects, and PARTICIPANT as a random effect.

500

501 Mixed-models were fit as follows:

502 Full model:  $EXPRESSION \sim TIME + PROTECTION + TIME:PROTECTION + (1|PARTICIPANT)$

503 Reduced model 1:  $EXPRESSION \sim PROTECTION + (1|PARTICIPANT)$

504 Reduced model 2:  $EXPRESSION \sim TIME + (1|PARTICIPANT)$

505

506 By contrasting the full model with reduced models lacking the TIME and PROTECTION terms, the  
507 significance of relationships between the TIME and PROTECTION variables and EXPRESSION were  
508 evaluated. ANOVA was used to compare the full model with reduced model 1, where *P*-values  
509 represent the significance of the improvement of fit associated with the TIME term in the  
510 analysis. FDR-adjusted *P*-values were computed using the Benjamini-Hochberg method.  
511 PROTECTION-associated genes were similarly identified within the TIME significant genes using  
512 ANOVA to compare the full model with reduced model 2.

513

514 To identify genes with significant changes in EXPRESSION at specific time points relative to the  
515 pre-vaccination state, five full models were fit for each gene with two time points (each time  
516 point following vaccination 1 and its previous time point, i.e. time intervals) included in the TIME  
517 term. In addition, for each gene, models were fit that included all time points (Days 0,1,3,7,14,28)  
518 to identify transcriptional signatures that had temporal effects at any time point.

519

520 To determine the direction (UP/DOWN) of transcriptional responses relative to either pre-  
521 vaccination time point or the previous time point in all immunized subjects, 90% confidence  
522 intervals were estimated for the TIME coefficient of the reduced model 2 as above. Cases where  
523 the lower CI > 0 were considered UP genes, upper CI < 0 were considered DOWN genes.

524

525 **Mixed-effects modeling to identify cell types that had significantly different cell proportion**  
526 **changes in P and NP immunized participants after the primary vaccination**

527 Linear mixed-effects regression models (LMER) were used to model individual cell type  
528 proportion (PERCENTAGE) as a function of sample collection time (TIME) and protection after  
529 CHMI (PROTECTION), with TIME and PERCENTAGE as fixed effects, and PARTICIPANT as a random  
530 effect.

531

532 Mixed-models were fit as follows:

533 Full model: PERCENTAGE ~ TIME + PROTECTION + TIME:PROTECTION + (1 | PARTICIPANT)

534 Reduced model 1: PERCENTAGE ~ TIME + (1 | PARTICIPANT)

535

536 By contrasting the full model with reduced models lacking the PROTECTION terms, the  
537 significance of relationships between the PROTECTION variables and PERCENTAGE were  
538 evaluated. ANOVA was used to compare the full model with reduced model 1, where *P*-values  
539 represent the significance of the improvement of fit associated with the PROTECTION term in the  
540 analysis.

541

#### 542 **Gene set enrichment analysis (GSEA)**

543 GSEA was performed for each vaccination time interval using the R fgsea package (Korotkevich  
544 et al., 2016; Mootha et al., 2003; Subramanian et al., 2005) with 500 permutations and whole  
545 blood transcriptional modules (Chaussabel et al., 2008b; Li et al., 2014b; Subramanian et al.,  
546 2005; Tran et al., 2019). Genes were ranked by average fold change across each time interval  
547 (day 1 to day 0, day 3 to day 1, day 7 to day 3, day 14 to day 7, day 28 to day 14) separately for  
548 samples from P and NP subjects. Normalized enrichment scores (NES) of non-significant modules  
549 (FDR-adjusted *P*-value > 0.05) were set to 0.

550

#### 551 **Statistical tests**

552 The hypergeometric test was used to identify BTM modules enriched for subsets of genes. The  
553 resultant effect size (ES) was calculated as:  $(b/n)/(B/N)$ , in which n: Number of genes of interest;  
554 N: Number of total mapped genes; b: Number of genes of interest from the given module; B:  
555 Number of genes from the module in the total mapped genes.

556

557 Ingenuity pathway analysis (IPA) was performed using the IPA software from Qiagen. *P*-values  
558 were calculated using Fisher's Exact Test and FDR-adjusted *P*-values < 0.1 were considered  
559 significant.

560

#### 561 **Unsupervised clustering**

562 Hierarchical clustering of summary measures representing gene expression/responses (average  
563 gene fold changes, GSEA NES, or ES scores) was computed by agglomerative complete linkage  
564 with 1 - (Pearson's correlation coefficient) as the distance metric. The optimal number of clusters  
565 was determined by the "elbow" method (Thorndike, 1953).

566

#### 567 **Flow cytometry data**

568 PBMCs were collected from IMRAS participants on day 0, and 3, 7 and 14 after the first  
569 immunization and frozen for later use. After thawing in RPMI supplemented with 10% FBS and



570 benzonase nuclease (Millipore EMD 0.05 U/ml), the samples were incubated with LIVE/DEAD™  
571 Fixable Blue Dead Cell Stain Kit and the Human BD Fc Block for 30 min at room temperature  
572 before being simultaneously stained with four phenotyping panels that have been previously  
573 described in OMIP-044 and OMIP-064 and further described in Table S2 (Hertoghs et al., 2020;  
574 Mair and Prlic, 2018). The cells were then acquired using a BD FACSymphony flow cytometer. The  
575 data were analyzed, and cellular populations gated and quantified using FlowJo Software (version  
576 9.6.6). The percentage contribution of each manually gated cell subset was calculated using the  
577 counts of each defined cell subset divided by the total single live cells from that sample. Pearson  
578 correlation coefficients were calculated between cell type proportion changes and BTM mean  
579 expression level changes per-time interval for P and NP subjects separately.

580

### 581 **CITE-seq single-cell RNA seq processing**

582 Live frozen PBMCs were obtained from a single vaccinated individual in cohort 1 of the IMRAS  
583 trial at day 0, and three- and 14-days post first vaccination. Cells were thawed and washed with  
584 RPMI supplemented with 10% FBS and benzonase nuclease (Millipore EMD 0.05 U/ml). PBMCs  
585 were resuspended in 100 µl of PBS supplemented with 2% w/v Fetal Bovine Serum (FBS) and  
586 incubated with Fixable Viability Stain 510 and Human BD Fc Block for 30 minutes at room  
587 temperature. Cells were washed with 2% FBS PBS before incubating with a panel of previously  
588 titrated 14 barcoded oligo-conjugated antibodies (BioLegend TotalSeq-C), including FITC-anti-  
589 CD45. Stained PBMC samples were then sorted by fluorescence activated cell sorting (FACS) on  
590 a BD FACSMelody to enrich for live, hematopoietic cells. A standard viable CD45+ cell gating  
591 scheme was employed; FSC-A v SSCA (to exclude sub-cellular debris), two FSC-A doublet  
592 exclusion gates (FSC-W followed by FSC-H), dead cell exclusion gate (BV510 LIVE/DEAD negative)  
593 followed by CD45+ inclusion gate.

594 Sorted cells were resuspended in PBS supplemented with 1% BSA. Cells were loaded onto the  
595 10X Chromium system, where we aimed for recovery of ~5000 cells per sample, and subjected  
596 to partitioning with barcoded 5' V1.1 chemistry gel-beads (10X Genomics) to generate the Gel-  
597 Bead in Emulsions (GEMs). The RT reaction was conducted in the GEMs, barcoded cDNA  
598 extracted by post-GEM RT-cleanup, and cDNA and antibody barcodes amplified with 14 cycles.  
599 Amplified cDNA was subjected to SPRI bead cleanup at 0.6X. Amplified antibody barcodes were  
600 recovered from the supernatant and were processed to generate TotalSeq-C libraries as  
601 instructed by the manufacturers (10X Genomics and BioLegend, TotalSeq-C with 10x Feature  
602 Barcoding Protocol). The remaining amplified cDNA was subjected to enzymatic fragmentation,  
603 end-repair, A-tailing, adapter ligation and 10X specific sample indexing as per manufacturer's  
604 protocol. Libraries were quantified using Bioanalyzer (Agilent) analysis. 10x Genomics scRNA-Seq  
605 and TotalSeq-C libraries were pooled and sequenced on an Illumina NovaSeq Sp100 flow cell

606 using the recommended sequencing read lengths of 26 bp (Read 1), 8 bp (i7 Index Read), and 91  
607 bp (Read 2), and depths of 50,000 and 5000 read pairs per cell for the 5' Gene Expression and  
608 TotalSeq-C libraries respectively. Cell Ranger v3.1.0 (10x Genomics) was used to demultiplex raw  
609 sequencing data and quantitate transcript levels against the 10x Genomics GRCh38 reference.

#### 610 **Single-cell RNA seq processing and analysis**

611 Raw count data were filtered to remove cells where 1) a mitochondrial RNA fraction greater than  
612 7.5% of total RNA counts per cell, and 2) less than 200 or greater than 2500 genes were detected.  
613 The resultant count matrix was used to create a Seurat (v4.0.1) (Hao et al., 2021) object. Filtered  
614 read counts were normalized, scaled, and corrected for mitochondrial and rRNA read  
615 percentages with the SCTransform function. The ADT matrix was normalized per feature using  
616 center log normalization. Cell types in each sample were annotated by mapping to the annotated  
617 reference PBMC dataset provided in the Seurat v4 Azimuth workflow. Briefly, anchors between  
618 the query and reference datasets were identified using a precomputed supervised PCA on the  
619 reference dataset. Next, cell type labels from the reference dataset, as well as imputations of all  
620 measured protein markers, were transferred to each cell of the query datasets through the  
621 previously identified anchors. The query datasets were then merged and projected onto the  
622 UMAP structure of the reference. The genes expressed in each specific cell cluster were identified  
623 using the FindAllMarkers function from the Seurat4 package and filtered to include those with  
624 average log<sub>2</sub> fold changes greater than 1 and FDR-adjusted P-values less than 0.05.

625

#### 626 **Acknowledgements**

627 We would like to thank Michael Gale and Nana Minkah for their helpful comments on the  
628 manuscript. We would also like to acknowledge the contribution of all the IMRAS study  
629 volunteers.

630

#### 631 **Competing Interests**

632 The authors declare no competing interests exist

633

634

635

636

637

638 **References:**

- 639 Ali S, Mann-Nüttel R, Schulze A, Richter L, Alferink J, Scheu S. 2019. Sources of type I interferons  
640 in infectious immunity: Plasmacytoid dendritic cells not always in the driver's seat. *Front*  
641 *Immunol.* doi:10.3389/fimmu.2019.00778
- 642 Anders S, Pyl PT, Huber W. 2015. HTSeq-A Python framework to work with high-throughput  
643 sequencing data. *Bioinformatics* **31**:166–169. doi:10.1093/bioinformatics/btu638
- 644 Bates D, Mächler M, Bolker BM, Walker SC. 2015. Fitting linear mixed-effects models using  
645 lme4. *J Stat Softw* **67**:1–48. doi:10.18637/jss.v067.i01
- 646 Becker M, De Bastiani MA, Parisi MM, Guma FT, Markoski MM, Castro MAA, Kaplan MH,  
647 Barbé-Tuana FM, Klamt F. 2015. Integrated Transcriptomics Establish Macrophage  
648 Polarization Signatures and have Potential Applications for Clinical Health and Disease. *Sci*  
649 *Rep* **5**:13351. doi:10.1038/srep13351
- 650 Chaussabel D, Quinn C, Shen J, Patel P, Glaser C, Baldwin N, Stichweh D, Blankenship D, Li L,  
651 Munagala I, Bennett L, Allantaz F, Mejias A, Ardura M, Kaizer E, Monnet L, Allman W,  
652 Randall H, Johnson D, Lanier A, Punaro M, Wittkowski KM, White P, Fay J, Klintmalm G,  
653 Ramilo O, Palucka AK, Banchereau J, Pascual V. 2008a. A modular analysis framework for  
654 blood genomics studies: application to systemic lupus erythematosus. *Immunity* **29**:150–  
655 64. doi:10.1016/j.immuni.2008.05.012
- 656 Chaussabel D, Quinn C, Shen J, Patel P, Glaser C, Baldwin N, Stichweh D, Blankenship D, Li L,  
657 Munagala I, Bennett L, Allantaz F, Mejias A, Ardura M, Kaizer E, Monnet L, Allman W,  
658 Randall H, Johnson D, Lanier A, Punaro M, Wittkowski KM, White P, Fay J, Klintmalm G,  
659 Ramilo O, Palucka AK, Banchereau J, Pascual V. 2008b. A Modular Analysis Framework for  
660 Blood Genomics Studies: Application to Systemic Lupus Erythematosus. *Immunity* **29**:150–  
661 164. doi:10.1016/j.immuni.2008.05.012
- 662 Cockburn IA, Amino R, Kelemen RK, Kuo SC, Tse S-W, Radtke A, Mac-Daniel L, Ganusov V V,  
663 Zavala F, Menard R. 2013. In vivo imaging of CD8+ T cell-mediated elimination of malaria  
664 liver stages. *Proc Natl Acad Sci* **110**:9090–9095. doi:10.1073/pnas.1303858110
- 665 Coelho CH, Doritchamou JYA, Zaidi I, Duffy PE. 2017. Advances in malaria vaccine development:  
666 Report from the 2017 malaria vaccine symposium Npj Vaccines. Nature Publishing Group.  
667 doi:10.1038/s41541-017-0035-3
- 668 Collin M, Bigley V. 2018. Human dendritic cell subsets: an update. *Immunology.*  
669 doi:10.1111/imm.12888
- 670 Costantini C, Cassatella MA. 2011. The defensive alliance between neutrophils and NK cells as a  
671 novel arm of innate immunity. *J Leukoc Biol* **89**:221–233. doi:10.1189/jlb.0510250
- 672 de Paus RA, van Wengen A, Schmidt I, Visser M, Verdegaal EME, van Dissel JT, van de Vosse E.  
673 2013. Inhibition of the type I immune responses of human monocytes by IFN- $\alpha$  and IFN- $\beta$ .  
674 *Cytokine* **61**:645–655. doi:10.1016/j.cyto.2012.12.005

- 675 Dobin A, Davis CA, Schlesinger F, Drenkow J, Zaleski C, Jha S, Batut P, Chaisson M, Gingeras TR.  
676 2013. STAR: Ultrafast universal RNA-seq aligner. *Bioinformatics* **29**:15–21.  
677 doi:10.1093/bioinformatics/bts635
- 678 Doolan DL, Hoffman SL. 2000. The Complexity of Protective Immunity Against Liver-Stage  
679 Malaria. *J Immunol* **165**:1453–1462. doi:10.4049/jimmunol.165.3.1453
- 680 Epstein JE, Paolino KM, Richie TL, Sedegah M, Singer A, Ruben AJ, Chakravarty S, Stafford A,  
681 Ruck RC, Eappen AG, Li T, Billingsley PF, Manoj A, Silva JC, Moser K, Nielsen R, Tosh D,  
682 Cicatelli S, Ganeshan H, Case J, Padilla D, Davidson S, Garver L, Saverino E, Murshedkar T,  
683 Gunasekera A, Twomey PS, Reyes S, Moon JE, James ER, Kc N, Li M, Abot E, Belmonte A,  
684 Hauns K, Belmonte M, Huang J, Vasquez C, Remich S, Carrington M, Abebe Y, Tillman A,  
685 Hickey B, Regules J, Villasante E, Sim BKL, Hoffman SL. 2017. Protection against  
686 Plasmodium falciparum malaria by PfSPZ Vaccine. *JCI insight* **2**:e89154.  
687 doi:10.1172/jci.insight.89154
- 688 Fernandez-Ruiz D, Ng WY, Holz LE, Ma JZ, Zaid A, Wong YC, Lau LS, Mollard V, Cozijnsen A,  
689 Collins N, Li J, Davey GM, Kato Y, Devi S, Skandari R, Pauley M, Manton JH, Godfrey DI,  
690 Braun A, Tay SS, Tan PS, Bowen DG, Koch-Nolte F, Rissiek B, Carbone FR, Crabb BS, Lahoud  
691 M, Cockburn IA, Mueller SN, Bertolino P, McFadden GI, Caminschi I, Heath WR. 2016a.  
692 Liver-Resident Memory CD8+ T Cells Form a Front-Line Defense against Malaria Liver-Stage  
693 Infection. *Immunity* **45**:889–902. doi:10.1016/j.immuni.2016.08.011
- 694 Fernandez-Ruiz D, Ng WY, Holz LE, Ma JZ, Zaid A, Wong YC, Lau LS, Mollard V, Cozijnsen A,  
695 Collins N, Li J, Davey GM, Kato Y, Devi S, Skandari R, Pauley M, Manton JH, Godfrey DI,  
696 Braun A, Tay SS, Tan PS, Bowen DG, Koch-Nolte F, Rissiek B, Carbone FR, Crabb BS, Lahoud  
697 M, Cockburn IA, Mueller SN, Bertolino P, McFadden GI, Caminschi I, Heath WR, Chun Y.  
698 2016b. Supplemental Information Liver-Resident Memory CD8 + T Cells Form a Front-Line  
699 Defense against Malaria Liver-Stage Infection. *Immunity* **45**:889–902.  
700 doi:10.1016/j.immuni.2016.08.011
- 701 George VK, Pallikkuth S, Pahwa R, De Armas LR, Rinaldi S, Pan L, Pahwa S. 2018. Circulating  
702 inflammatory monocytes contribute to impaired influenza vaccine responses in HIV-  
703 infected participants. *AIDS* **32**:1219–1228. doi:10.1097/QAD.0000000000001821
- 704 Guarda G, Braun M, Staehli F, Tardivel A, Mattmann C, Förster I, Farlik M, Decker T, Du Pasquier  
705 RA, Romero P, Tschopp J. 2011. Type I Interferon Inhibits Interleukin-1 Production and  
706 Inflammasome Activation. *Immunity* **34**:213–223. doi:10.1016/j.immuni.2011.02.006
- 707 Hao Y, Hao S, Andersen-Nissen E, Mauck WM, Zheng S, Butler A, Lee MJ, Wilk AJ, Darby C, Zager  
708 M, Hoffman P, Stoeckius M, Papalexi E, Mimitou EP, Jain J, Srivastava A, Stuart T, Fleming  
709 LM, Yeung B, Rogers AJ, McElrath JM, Blish CA, Gottardo R, Smibert P, Satija R. 2021.  
710 Integrated analysis of multimodal single-cell data. *Cell*. doi:10.1016/j.cell.2021.04.048
- 711 Haque A, Best SE, De Oca MM, James KR, Ammerdorffer A, Edwards CL, De Labastida Rivera F,  
712 Amante FH, Bunn PT, Sheel M, Sebina I, Koyama M, Varelias A, Hertzog PJ, Kalinke U, Gun  
713 SY, Rénia L, Ruedl C, MacDonald KPA, Hill GR, Engwerda CR. 2014. Type I IFN signaling in

- 714 CD8-DCs impairs Th1-dependent malaria immunity. *J Clin Invest* **124**:2483–2496.  
715 doi:10.1172/JCI70698
- 716 Hart GT, Tran TM, Theorell J, Schlums H, Arora G, Rajagopalan S, Jules Sangala AD, Welsh KJ,  
717 Traore B, Pierce SK, Crompton PD, Bryceson YT, Long EO. 2019. Adaptive NK cells in people  
718 exposed to *Plasmodium falciparum* correlate with protection from malaria. *J Exp Med*  
719 **216**:1280–1290. doi:10.1084/jem.20181681
- 720 Hayakawa Y, Screpanti V, Yagita H, Grandien A, Ljunggren H-G, Smyth MJ, Chambers BJ. 2004.  
721 NK Cell TRAIL Eliminates Immature Dendritic Cells In Vivo and Limits Dendritic Cell  
722 Vaccination Efficacy. *J Immunol* **172**:123–129. doi:10.4049/jimmunol.172.1.123
- 723 Hertoghs N, Schwedhelm K V., Stuart KD, McElrath MJ, De Rosa SC. 2020. OMIP-064: A 27-Color  
724 Flow Cytometry Panel to Detect and Characterize Human NK Cells and Other Innate  
725 Lymphoid Cell Subsets, MAIT Cells, and  $\gamma\delta$  T Cells. *Cytom Part A* **97**:1019–1023.  
726 doi:10.1002/cyto.a.24031
- 727 Hickey B, Teneza-Mora N, Lumsden J, Reyes S, Sedegah M, Garver L, Hollingdale MR, Banania  
728 JG, Ganeshan H, Dowler M, Reyes A, Tamminga C, Singer A, Simmons A, Belmonte M,  
729 Belmonte A, Huang J, Inoue S, Velasco R, Abot S, Vasquez CS, Guzman I, Wong M, Twomey  
730 P, Wojnarski M, Moon J, Alcorta Y, Maiolatesi S, Spring M, Davidson S, Chaudhury S,  
731 Villasante E, Richie TL, Epstein JE. 2020. IMRAS—A clinical trial of mosquito-bite  
732 immunization with live, radiation-attenuated *P. falciparum* sporozoites: Impact of  
733 immunization parameters on protective efficacy and generation of a repository of  
734 immunologic reagents. *PLoS One* **15**:e0233840. doi:10.1371/journal.pone.0233840
- 735 Hwang I, Zhang T, Scott JM, Kim AR, Lee T, Kakarla T, Kim A, Sunwoo JB, Kim S. 2012.  
736 Identification of human NK cells that are deficient for signaling adaptor FcR $\gamma$  and  
737 specialized for antibody-dependent immune functions. *Int Immunol* **24**:793–802.  
738 doi:10.1093/intimm/dxs080
- 739 Ishizuka AS, Lyke KE, DeZure A, Berry AA, Richie TL, Mendoza FH, Enama ME, Gordon IJ, Chang  
740 L-JJ, Sarwar UN, Zephir KL, Holman LA, James ER, Billingsley PF, Gunasekera A, Chakravarty  
741 S, Manoj A, Li M, Ruben AJ, Li T, Eappen AG, Stafford RE, K C N, Murshedkar T, DeCederfelt  
742 H, Plummer SH, Hendel CS, Novik L, Costner PJMM, Saunders JG, Laurens MB, Plowe C V.,  
743 Flynn B, Whalen WR, Todd JP, Noor J, Rao S, Sierra-Davidson K, Lynn GM, Epstein JE, Kemp  
744 MA, Fahle GA, Mikolajczak SA, Fishbaugher M, Sack BK, Kappe SHII, Davidson SA, Garver  
745 LS, Björkström NK, Nason MC, Graham BS, Roederer M, Sim BKL, Hoffman SL, Ledgerwood  
746 JE, Seder RA, C NK, Murshedkar T, DeCederfelt H, Plummer SH, Hendel CS, Novik L, M  
747 Costner PJ, Saunders JG, Laurens MB, Plowe C V., Flynn B, Whalen WR, Todd JP, Noor J,  
748 Rao S, Sierra-Davidson K, Lynn GM, Epstein JE, Kemp MA, Fahle GA, Mikolajczak SA,  
749 Fishbaugher M, Sack BK, I Kappe SH, Davidson SA, Garver LS, Björkström NK, Nason MC,  
750 Graham BS, Roederer M, Kim Lee Sim B, Hoffman SL, Ledgerwood JE, Seder RA, Natasha  
751 KC, Murshedkar T, DeCederfelt H, Plummer SH, Hendel CS, Novik L, Costner PJMM,  
752 Saunders JG, Laurens MB, Plowe C V., Flynn B, Whalen WR, Todd JP, Noor J, Rao S, Sierra-  
753 Davidson K, Lynn GM, Epstein JE, Kemp MA, Fahle GA, Mikolajczak SA, Fishbaugher M,

- 754 Sack BK, Kappe SHI, Davidson SA, Garver LS, Björkström NK, Nason MC, Graham BS,  
755 Roederer M, Kim Lee Sim B, Hoffman SL, Ledgerwood JE, Seder RA. 2016. Protection  
756 against malaria at 1 year and immune correlates following PfSPZ vaccination. *Nat Med*  
757 **22**:614–623. doi:10.1038/nm.4110
- 758 Jensen MA, Yanowitch RN, Reder AT, White DM, Arnason BG. 2010. Immunoglobulin-like  
759 transcript 3, an inhibitor of T cell activation, is reduced on blood monocytes during  
760 multiple sclerosis relapses and is induced by interferon  $\beta$ 2-1b. *Mult Scler* **16**:30–38.  
761 doi:10.1177/1352458509352794
- 762 Kaushansky A, Metzger PG, Douglass AN, Mikolajczak SA, Lakshmanan V, Kain HS, Kappe SHI.  
763 2013. Malaria parasite liver stages render host hepatocytes susceptible to mitochondria-  
764 initiated apoptosis. *Cell Death Dis* **4**. doi:10.1038/cddis.2013.286
- 765 Kazmin D, Nakaya HI, Lee EK, Johnson MJ, Van Der Most R, Van Den Berg RA, Ballou WR,  
766 Jongert E, Wille-Reece U, Ockenhouse C, Aderem A, Zak DE, Sadoff J, Hendriks J,  
767 Wrammert J, Ahmed R, Pulendran B. 2017. Systems analysis of protective immune  
768 responses to RTS,S malaria vaccination in humans. *Proc Natl Acad Sci U S A* **114**:2425–  
769 2430. doi:10.1073/pnas.1621489114
- 770 Kim B, Kim TH. 2018. Fundamental role of dendritic cells in inducing Th2 responses. *Korean J*  
771 *Intern Med*. doi:10.3904/kjim.2016.227
- 772 King T, Lamb T. 2015. Interferon- $\gamma$ : The Jekyll and Hyde of Malaria. *PLoS Pathog*.  
773 doi:10.1371/journal.ppat.1005118
- 774 Korotkevich G, Sukhov V, Budin N, Shpak B, Artyomov M, Sergushichev A. 2016. Fast gene set  
775 enrichment analysis. *bioRxiv* 060012. doi:10.1101/060012
- 776 Kurup SP, Anthony SM, Hancox LS, Vijay R, Pewe LL, Moioffer SJ, Sompallae R, Janse CJ, Khan  
777 SM, Harty JT. 2019. Monocyte-Derived CD11c + Cells Acquire Plasmodium from  
778 Hepatocytes to Prime CD8 T Cell Immunity to Liver-Stage Malaria. *Cell Host Microbe*  
779 **25**:565-577.e6. doi:10.1016/j.chom.2019.02.014
- 780 Kusmartsev S, Nefedova Y, Yoder D, Gabrilovich DI. 2004. Antigen-Specific Inhibition of CD8 + T  
781 Cell Response by Immature Myeloid Cells in Cancer Is Mediated by Reactive Oxygen  
782 Species. *J Immunol* **172**:989–999. doi:10.4049/jimmunol.172.2.989
- 783 Lee AJ, Chen B, Chew M V., Barra NG, Shenouda MM, Nham T, van Rooijen N, Jordana M,  
784 Mossman KL, Schreiber RD, Mack M, Ashkar AA. 2017. Inflammatory monocytes require  
785 type I interferon receptor signaling to activate NK cells via IL-18 during a mucosal viral  
786 infection. *J Exp Med* **214**:1153–1167. doi:10.1084/jem.20160880
- 787 Li D, Chen Y, Liu H, Jia Y, Li F, Wang W, Wu J, Wan Z, Cao Y, Zeng R. 2020. Immune dysfunction  
788 leads to mortality and organ injury in patients with COVID-19 in China: insights from ERS-  
789 COVID-19 study. *Signal Transduct Target Ther* **5**:62. doi:10.1038/s41392-020-0163-5
- 790 Li S, Nakaya HI, Kazmin DA, Oh JZ, Pulendran B. 2013. Systems biological approaches to  
791 measure and understand vaccine immunity in humans. *Semin Immunol*.

- 792           doi:10.1016/j.smim.2013.05.003
- 793   Li S, Rouphael N, Duraisingham S, Romero-Steiner S, Presnell S, Davis C, Schmidt DS, Johnson  
794   SE, Milton A, Rajam G, Kasturi S, Carlone GM, Quinn C, Chaussabel D, Palucka a K,  
795   Mulligan MJ, Ahmed R, Stephens DS, Nakaya HI, Pulendran B. 2014a. Molecular signatures  
796   of antibody responses derived from a systems biology study of five human vaccines. *Nat*  
797   *Immunol* **15**:195–204. doi:10.1038/ni.2789
- 798   Li S, Rouphael N, Duraisingham S, Romero-Steiner S, Presnell S, Davis C, Schmidt DS, Johnson  
799   SE, Milton A, Rajam G, Kasturi S, Carlone GM, Quinn C, Chaussabel D, Palucka AK, Mulligan  
800   MJ, Ahmed R, Stephens DS, Nakaya HI, Pulendran B. 2014b. Molecular signatures of  
801   antibody responses derived from a systems biology study of five human vaccines. *Nat*  
802   *Immunol* **15**:195–204. doi:10.1038/ni.2789
- 803   Liberzon A, Birger C, Thorvaldsdóttir H, Ghandi M, Mesirov JP, Tamayo P. 2015. The Molecular  
804   Signatures Database (MSigDB) hallmark gene set collection. *Cell Syst* **1**:417–425.  
805   doi:10.1016/j.cels.2015.12.004
- 806   Liehl P, Meireles P, Albuquerque IS, Pinkevych M, Baptista F, Mota MM, Davenport MP,  
807   Prudêncio M. 2015. Innate immunity induced by Plasmodium liver infection inhibits  
808   malaria reinfections. *Infect Immun* **83**:1172–1180. doi:10.1128/IAI.02796-14
- 809   Liehl P, Zuzarte-Luís V, Chan J, Zillinger T, Baptista F, Carapau D, Konert M, Hanson KK, Carret C,  
810   Lassnig C, Müller M, Kalinke U, Saeed M, Chora AF, Golenbock DT, Strobl B, Prudêncio M,  
811   Coelho LP, Kappe SH, Superti-Furga G, Pichlmair A, Vigário AM, Rice CM, Fitzgerald KA,  
812   Barchet W, Mota MM. 2014. Host-cell sensors for Plasmodium activate innate immunity  
813   against liver-stage infection. *Nat Med* **20**:47–53. doi:10.1038/nm.3424
- 814   Mair F, Prlic M. 2018. OMIP-044: 28-color immunophenotyping of the human dendritic cell  
815   compartment. *Cytom Part A* **93**:402–405. doi:10.1002/cyto.a.23331
- 816   Mantovani A, Cassatella MA, Costantini C, Jaillon S. 2011. Neutrophils in the activation and  
817   regulation of innate and adaptive immunity. *Nat Publ Gr*. doi:10.1038/nri3024
- 818   Marques-Da-Silva C, Poudel B, Baptista RP, Peissig K, Hancox LS, Shiao JC, Pewe LL, Shears MJ,  
819   Kanneganti T-D, Sinnis P, Kyle DE, Gurung P, Harty JT, Kurup SP. 2021. Altered cleavage of  
820   Caspase-1 in hepatocytes limits control of malaria in the liver. *Biorxiv*.  
821   doi:10.1101/2021.01.28.427517
- 822   McCarthy DJ, Chen Y, Smyth GK. 2012. Differential expression analysis of multifactor RNA-Seq  
823   experiments with respect to biological variation. *Nucleic Acids Res* **40**:4288–4297.  
824   doi:10.1093/nar/gks042
- 825   McKinney EF, Cuthbertson I, Harris KM, Smilek DE, Connor C, Manferrari G, Carr EJ, Zamvil SS,  
826   Smith KGC. 2021. A CD8+ NK cell transcriptomic signature associated with clinical outcome  
827   in relapsing remitting multiple sclerosis. *Nat Commun* **12**. doi:10.1038/s41467-020-20594-  
828   2
- 829   McNab F, Mayer-Barber K, Sher A, Wack A, O’Garra A. 2015. Type I interferons in infectious

- 830 disease. *Nat Rev Immunol* **15**:87–103. doi:10.1038/nri3787
- 831 McNamara HA, Cai Y, Wagle M V., Sontani Y, Roots CM, Miosge LA, O'Connor JH, Sutton HJ,  
832 Ganusov V V., Heath WR, Bertolino P, Goodnow CG, Parish IA, Enders A, Cockburn IA.  
833 2017. Up-regulation of LFA-1 allows liver-resident memory T cells to patrol and remain in  
834 the hepatic sinusoids. *Sci Immunol* **2**. doi:10.1126/sciimmunol.aaj1996
- 835 Mehta P, McAuley DF, Brown M, Sanchez E, Tattersall RS, Manson JJ. 2020. COVID-19: consider  
836 cytokine storm syndromes and immunosuppression. *Lancet*. doi:10.1016/S0140-  
837 6736(20)30628-0
- 838 Miller JL, Sack BK, Baldwin M, Vaughan AM, Kappe SHII. 2014. Interferon-Mediated Innate  
839 Immune Responses against Malaria Parasite Liver Stages. *Cell Rep* **7**:436–447.  
840 doi:10.1016/j.celrep.2014.03.018
- 841 Minkah NK, Wilder BK, Sheikh AA, Martinson T, Wegmair L, Vaughan AM, Kappe SHII. 2019.  
842 Innate immunity limits protective adaptive immune responses against pre-erythrocytic  
843 malaria parasites. *Nat Commun* **10**:1–14. doi:10.1038/s41467-019-11819-0
- 844 Mitchell LA, Henderson AJ, Dow SW. 2012. Suppression of Vaccine Immunity by Inflammatory  
845 Monocytes. *J Immunol* **189**:5612–5621. doi:10.4049/jimmunol.1202151
- 846 Mootha VK, Lindgren CM, Eriksson KF, Subramanian A, Sihag S, Lehar J, Puigserver P, Carlsson E,  
847 Ridderstråle M, Laurila E, Houstis N, Daly MJ, Patterson N, Mesirov JP, Golub TR, Tamayo P,  
848 Spiegelman B, Lander ES, Hirschhorn JN, Altshuler D, Groop LC. 2003. PGC-1 $\alpha$ -responsive  
849 genes involved in oxidative phosphorylation are coordinately downregulated in human  
850 diabetes. *Nat Genet* **34**:267–273. doi:10.1038/ng1180
- 851 Nagai T, Devergne O, Mueller TF, Perkins DL, van Seventer JM, van Seventer GA. 2003. Timing of  
852 IFN- $\beta$  Exposure during Human Dendritic Cell Maturation and Naive Th Cell Stimulation Has  
853 Contrasting Effects on Th1 Subset Generation: A Role for IFN- $\beta$ -Mediated Regulation of IL-  
854 12 Family Cytokines and IL-18 in Naive Th Cell Differentiation. *J Immunol* **171**:5233–5243.  
855 doi:10.4049/jimmunol.171.10.5233
- 856 Obeng-Adjei N, Portugal S, Tran TM, Yazew TB, Skinner J, Li S, Jain A, Felgner PL, Doumbo OK,  
857 Kayentao K, Ongoiba A, Traore B, Crompton PD. 2015. Circulating Th1-Cell-type Tfh Cells  
858 that Exhibit Impaired B Cell Help Are Preferentially Activated during Acute Malaria in  
859 Children. *Cell Rep* **13**:425–439. doi:10.1016/j.celrep.2015.09.004
- 860 Otsuka A, Nakajima S, Kubo M, Egawa G, Honda T, Kitoh A, Nomura T, Hanakawa S, Sagita  
861 Moniaga C, Kim B, Matsuoka S, Watanabe T, Miyachi Y, Kabashima K. 2013. Basophils are  
862 required for the induction of Th2 immunity to haptens and peptide antigens. *Nat Commun*  
863 **4**:1–9. doi:10.1038/ncomms2740
- 864 Perez-Mazliah D, Langhorne J. 2014. CD4 T-cell subsets in malaria: Th1/Th2 revisited. *Front*  
865 *Immunol*. doi:10.3389/fimmu.2014.00671
- 866 Phythian-Adams AT, Cook PC, Lundie RJ, Jones LH, Smith KA, Barr TA, Hochweller K, Anderton  
867 SM, Hämmerling GJ, Maizels RM, MacDonald AS. 2010. CD11c depletion severely disrupts



- 868 Th2 induction and development in vivo. *J Exp Med* **207**:2089–2096.  
869 doi:10.1084/jem.20100734
- 870 Piccioli D, Sbrana S, Melandri E, Valiante NM. 2002. Contact-dependent stimulation and  
871 inhibition of dendritic cells by natural killer cells. *J Exp Med* **195**:335–341.  
872 doi:10.1084/jem.20010934
- 873 Pichyangkul S, Spring MD, Yongvanitchit K, Kum-Arb U, Limsalakpetch A, Im-Erbsin R, Ubalee R,  
874 Vanachayangkul P, Remarque EJ, Angov E, Smith PL, Saunders DL. 2017. Chemoprophylaxis  
875 with sporozoite immunization in *P. knowlesi* rhesus monkeys confers protection and elicits  
876 sporozoite-specific memory T cells in the liver. *PLoS One* **12**:e0171826.  
877 doi:10.1371/journal.pone.0171826
- 878 Pillay J, Kamp VM, Van Hoffen E, Visser T, Tak T, Lammers JW, Ulfman LH, Leenen LP, Pickkers P,  
879 Koenderman L. 2012. A subset of neutrophils in human systemic inflammation inhibits T  
880 cell responses through Mac-1. *J Clin Invest* **122**:327–336. doi:10.1172/JCI57990
- 881 Portugal S, Moebius J, Skinner J, Doumbo S, Doumtabe D, Kone Y, Dia S, Kanakabandi K,  
882 Sturdevant DE, Virtaneva K, Porcella SF, Li S, Doumbo OK, Kayentao K, Ongoiba A, Traore B,  
883 Crompton PD. 2014. Exposure-Dependent Control of Malaria-Induced Inflammation in  
884 Children. *PLoS Pathog* **10**. doi:10.1371/journal.ppat.1004079
- 885 Portugal S, Tipton CM, Sohn H, Kone Y, Wang J, Li S, Skinner J, Virtaneva K, Sturdevant DE,  
886 Porcella SF, Doumbo OK, Doumbo S, Kayentao K, Ongoiba A, Traore B, Sanz I, Pierce SK,  
887 Crompton PD. 2015. Malaria-associated atypical memory B cells exhibit markedly reduced  
888 B cell receptor signaling and effector function. *Elife* **4**. doi:10.7554/eLife.07218
- 889 Rayamajhi M, Humann J, Penheiter K, Andreasen K, Lenz LL. 2010. Induction of IFN- $\alpha\beta$  enables  
890 *Listeria monocytogenes* to suppress macrophage activation by IFN- $\gamma$ . *J Exp Med* **207**:327–  
891 337. doi:10.1084/jem.20091746
- 892 Reece WHH, Pinder M, Gothard PK, Milligan P, Bojang K, Doherty T, Plebanski M, Akinwunmi P,  
893 Everaere S, Watkins KR, Voss G, Tornieporth N, Allouche A, Greenwood BM, Kester KE,  
894 McAdam KPWJ, Cohen J, Hill AVS. 2004. A CD4+ T-cell immune response to a conserved  
895 epitope in the circumsporozoite protein correlates with protection from natural  
896 *Plasmodium falciparum* infection and disease. *Nat Med* **10**:406–410. doi:10.1038/nm1009
- 897 Rocha BC, Marques PE, Leoratti FM de S, Junqueira C, Pereira DB, Antonelli LR do V, Menezes  
898 GB, Golenbock DT, Gazzinelli RT. 2015. Type I Interferon Transcriptional Signature in  
899 Neutrophils and Low-Density Granulocytes Are Associated with Tissue Damage in Malaria.  
900 *Cell Rep* **13**:2829–2841. doi:10.1016/j.celrep.2015.11.055
- 901 Rolfes V, Ribeiro LS, Hawwari I, Böttcher L, Rosero N, Maasewerd S, Santos MLS, Schmidt S V,  
902 Rothe M, Stunden HJ, Carvalho LH, Fontes CJ, Arditi M, Latz E, Franklin BS. 2019. Platelets  
903 Fuel the Inflammasome Activation of Innate Immune Cells. *SSRN Electron J*.  
904 doi:10.2139/ssrn.3439682
- 905 RTSS Clinical Trials Partnership. 2015. Efficacy and safety of RTS,S/AS01 malaria vaccine with or

- 906 without a booster dose in infants and children in Africa: Final results of a phase 3,  
907 individually randomised, controlled trial. *Lancet* **386**:31–45. doi:10.1016/S0140-  
908 6736(15)60721-8
- 909 Schuster IS, Coudert JD, Andoniou CE, Degli-Esposti MA. 2016. “Natural Regulators”: NK cells as  
910 modulators of T cell immunity. *Front Immunol*. doi:10.3389/fimmu.2016.00235
- 911 Seder RA, Chang LJ, Enama ME, Zephir KL, Sarwar UN, Gordon IJ, Holman LSA, James ER,  
912 Billingsley PF, Gunasekera A, Richman A, Chakravarty S, Manoj A, Velmurugan S, Li ML,  
913 Ruben AJ, Li T, Eappen AG, Stafford RE, Plummer SH, Hendel CS, Novik L, Costner PJM,  
914 Mendoza FH, Saunders JG, Nason MC, Richardson JH, Murphy J, Davidson SA, Richie TL,  
915 Sedegah M, Sutamihardja A, Fahle GA, Lyke KE, Laurens MB, Roederer M, Tewari K, Epstein  
916 JE, Sim BKL, Ledgerwood JE, Graham BS, Hoffman SL. 2013. Protection against malaria by  
917 intravenous immunization with a nonreplicating sporozoite vaccine. *Science (80- )*  
918 **341**:1359–1365. doi:10.1126/science.1241800
- 919 Serafini P, Carbley R, Noonan KA, Tan G, Bronte V, Borrello I. 2004. High-Dose Granulocyte-  
920 Macrophage Colony-Stimulating Factor-Producing Vaccines Impair the Immune Response  
921 through the Recruitment of Myeloid Suppressor Cells, CANCER RESEARCH.
- 922 Subramanian A, Tamayo P, Mootha VK, Mukherjee S, Ebert BL, Gillette MA, Paulovich A,  
923 Pomeroy SL, Golub TR, Lander ES, Mesirov JP. 2005. Gene set enrichment analysis: A  
924 knowledge-based approach for interpreting genome-wide expression profiles. *Proc Natl*  
925 *Acad Sci U S A* **102**:15545–15550. doi:10.1073/pnas.0506580102
- 926 Sullivan BM, Juedes A, Szabo SJ, Von Herrath M, Glimcher LH. 2003. Antigen-driven effector  
927 CD8 T cell function regulated by T-bet. *Proc Natl Acad Sci U S A* **100**:15818–15823.  
928 doi:10.1073/pnas.2636938100
- 929 Tang H, Cao W, Kasturi SP, Ravindran R, Nakaya HI, Kundu K, Murthy N, Kepler TB, Malissen B,  
930 Pulendran B. 2010. The T helper type 2 response to cysteine proteases requires dendritic  
931 cell-basophil cooperation via ROS-mediated signaling. *Nat Immunol* **11**:608–617.  
932 doi:10.1038/ni.1883
- 933 Thompson EG, Du Y, Malherbe ST, Shankar S, Braun J, Valvo J, Ronacher K, Tromp G, Tabb DL,  
934 Alland D, Shenai S, Via LE, Warwick J, Aderem A, Scriba TJ, Winter J, Walzl G, Zak DE, Du  
935 Plessis N, Loxton AG, Chegou NN, Lee M. 2017. Host blood RNA signatures predict the  
936 outcome of tuberculosis treatment. *Tuberculosis* **107**:48–58.  
937 doi:10.1016/j.tube.2017.08.004
- 938 Thorndike RL. 1953. Who belongs in the family? *Psychometrika* **18**:267–276.  
939 doi:10.1007/BF02289263
- 940 Tjota MY, Sperling AI. 2014. Distinct dendritic cell subsets actively induce Th2 polarization. *Curr*  
941 *Opin Immunol*. doi:10.1016/j.coi.2014.09.006
- 942 Tran TM, Bijker EM, Haks MC, Ottenhoff THMM, Visser L, Schats R, Venepally P, Lorenzi H,  
943 Crompton PD, Sauerwein RW. 2019. Whole-blood transcriptomic signatures induced

- 944 during immunization by chloroquine prophylaxis and Plasmodium falciparum sporozoites.  
945 *Sci Rep* **9**:8386. doi:10.1038/s41598-019-44924-7
- 946 Trieu A, Kayala MA, Burk C, Molina DM, Freilich DA, Richie TL, Baldi P, Felgner PL, Doolan DL.  
947 2011. Sterile protective immunity to malaria is associated with a panel of novel P.  
948 falciparum antigens. *Mol Cell Proteomics* **10**. doi:10.1074/mcp.M111.007948
- 949 Tse S-W, Radtke AJ, Espinosa DA, Cockburn IA, Zavala F. 2014. The chemokine receptor CXCR6 is  
950 required for the maintenance of liver memory CD8<sup>+</sup> T cells specific for infectious  
951 pathogens. *J Infect Dis* **210**:1508–16. doi:10.1093/infdis/jiu281
- 952 van Eeden C, Khan L, Osman MS, Tervaert JWC. 2020. Natural killer cell dysfunction and its role  
953 in covid-19. *Int J Mol Sci* **21**:1–17. doi:10.3390/ijms21176351
- 954 Veeranki S, Duan X, Panchanathan R, Liu H, Choubey D. 2011. IFI16 protein mediates the anti-  
955 inflammatory actions of the type-I interferons through suppression of activation of  
956 caspase-1 by inflammasomes. *PLoS One* **6**. doi:10.1371/journal.pone.0027040
- 957 Vekemans J, Schellenberg D, Bennis S, O'Brien K, Alonso P. 2021. Meeting report: WHO  
958 consultation on malaria vaccine development, Geneva, 15–16 July 2019. *Vaccine*.  
959 doi:10.1016/j.vaccine.2021.03.093
- 960 Vivier E, Tomasello E, Baratin M, Walzer T, Ugolini S. 2008. Functions of natural killer cells. *Nat*  
961 *Immunol*. doi:10.1038/ni1582
- 962 Waschbisch A, Sanderson N, Krumbholz M, Vlad G, Theil D, Schwab S, Mäurer M, Derfuss T.  
963 2014. Interferon beta and vitamin D synergize to induce immunoregulatory receptors on  
964 peripheral blood monocytes of multiple sclerosis patients. *PLoS One* **9**.  
965 doi:10.1371/journal.pone.0115488
- 966 Weiss DJ, Bertozzi-Villa A, Rumisha SF, Amratia P, Arambepola R, Battle KE, Cameron E,  
967 Chestnutt E, Gibson HS, Harris J, Keddie S, Millar JJ, Rozier J, Symons TL, Vargas-Ruiz C, Hay  
968 SI, Smith DL, Alonso PL, Noor AM, Bhatt S, Gething PW. 2021. Indirect effects of the  
969 COVID-19 pandemic on malaria intervention coverage, morbidity, and mortality in Africa: a  
970 geospatial modelling analysis. *Lancet Infect Dis* **21**:59–69. doi:10.1016/S1473-  
971 3099(20)30700-3
- 972 Wherry EJ, Ha S-J, Kaech SM, Haining WN, Sarkar S, Kalia V, Subramaniam S, Blattman JN,  
973 Barber DL, Ahmed R. 2007. Molecular signature of CD8<sup>+</sup> T cell exhaustion during chronic  
974 viral infection. *Immunity* **27**:670–84. doi:10.1016/j.immuni.2007.09.006
- 975 Zambello R, Barilà G, Manni S, Piazza F, Semenzato G. 2020. NK cells and CD38: Implication for  
976 (Immuno)Therapy in Plasma Cell Dyscrasias. *Cells*. doi:10.3390/cells9030768
- 977 Zemans RL. 2018. Neutrophil-mediated T-cell suppression in influenza: Novel finding raising  
978 additional questions. *Am J Respir Cell Mol Biol*. doi:10.1165/rcmb.2017-0425ED
- 979 Zhang X, Ing S, Fraser A, Chen M, Khan O, Zakem J, Davis W, Quinet R. 2013. Follicular helper T  
980 cells: New insights into mechanisms of autoimmune diseases. *Ochsner J* **13**:131–139.

981 Zhao L, Wang H, Thomas R, Gao X, Bai H, Shekhar S, Wang S, Yang J, Zhao W, Yang X. 2020. NK  
982 cells modulate T cell responses via interaction with dendritic cells in *Chlamydomydia*  
983 pneumoniae infection. *Cell Immunol* **353**:104132. doi:10.1016/j.cellimm.2020.104132

984 Zheng M, Gao Y, Wang G, Song G, Liu S, Sun D, Xu Y, Tian Z. 2020. Functional exhaustion of  
985 antiviral lymphocytes in COVID-19 patients. *Cell Mol Immunol* **17**:533–535.  
986 doi:10.1038/s41423-020-0402-2

987

988

989

990

991

992

993

994

995

996

997

998

999

1000

1001

1002

1003

1004

1005

1006

1007

1008

1009 **Figure Legends**

1010

1011 **Figure 1. Vaccine induced gene responses after the first immunization. A** Barplot and table  
1012 showing numbers of vaccine-induced genes with increased (red) or decreased (green) expression  
1013 over each time interval in all immunized subjects (ALL\_UP, ALL\_DN) (FDR < 0.2,  $p < 0.05$ , 90% CI >  
1014 0 or < 0). Darker colors indicate genes that differ significantly in expression between protected  
1015 (P) and non-protected (NP) subjects (PROT\_UP, PROT\_DN). **B** Heatmap of modules significantly  
1016 enriched for vaccine-induced genes. Each row represents a BTM, each column represents a time  
1017 interval. Heatmap color shows hypergeometric effect size (ES) of a BTM enriched in genes with  
1018 increased (red/positive ES) or decreased (blue/negative ES) expression. Non-significant BTMs are  
1019 shown in white. Assignment of a BTM to a high-level annotation group is illustrated by a colored  
1020 sidebar.

1021

1022 **Figure 2. Vaccine induced protection associated gene responses. A,C.** Heatmaps showing 1394  
1023 protection-associated genes ordered by hierarchical clustering based on expression in P (**A**) and  
1024 NP (**C**) subjects for each time interval. Black sidebars indicate genes associated with an IPA  
1025 pathway or BTM. Colored sidebars indicate P and NP gene clusters. Expression values were z-  
1026 score transformed in rows for visualization. **B,D.** Enriched BTMs and IPA pathways for clusters  
1027 from P (**B**) and NP (**D**) subjects. X axis represents  $-\log_{10}(\text{FDR})$  generated from hypergeometric  
1028 tests. Color indicates assignment of a BTM module or IPA pathway to a high-level annotation  
1029 group. **E.** Circos plot showing overlap between P and NP clusters, numbered to match **A** and **C**,  
1030 and colored by cluster number (e.g: P\_1, NP\_1: green, P\_2, NP\_2:orange). **F.** Expression changes  
1031 of type I interferon-associated genes in P and NP subjects over each interval.

1032

1033 **Figure 3. Gene set enrichment analysis after the first immunization in P and NP subjects. A.**  
1034 Heatmap of GSEA normalized enrichments scores (NES) derived from BTM expression changes  
1035 over each time interval. Red represents activated BTMs and blue represents down-regulated  
1036 BTMs. Asterisks represent significant differences in expression between P and NP for a time  
1037 interval (Mann Whitney U test. \*\*\*\*:  $p < 0.0001$ ; \*\*\*:  $p < 0.001$ ; \*\*:  $p < 0.01$ ; \*:  $p < 0.05$ ). BTM  
1038 clusters derived from hierarchical clustering are indicated by numbers to the right of the  
1039 heatmap. Black sidebar on the left represents BTMs also enriched in unsupervised clusters of  
1040 protection associated genes in P and NP subjects (Fig 1 B). **B.** Relationships between BTMs within  
1041 the four identified clusters. BTMs with shared genes are connected by lines and the node sizes  
1042 correspond to the numbers of shared genes. Predominant cell-type module annotations for each  
1043 cluster are shown.

1044

1045 **Figure 4. Cell type-associated responses after the first vaccination. A.** Heatmap showing cell  
1046 type specific BTM GSEA NESs in P and NP subjects. **B.** Heatmap showing expression changes of

1047 malaria responding neutrophil genes in P and NP subjects on the sampling day compared with  
1048 the previous sampling day. Expression values were z-score transformed by row for visualization.  
1049

1050 **Figure 5. Temporal changes of specific cell types across time intervals in P and NP subjects. A-**  
1051 **D.** Changes in flow-cytometry measured PBMC sub-populations over time, relative to day 0. **A.**  
1052 non-classical monocytes and ILT3+ monocytes **B.** DCs **C.** T cells **D.** NK cells. Points represent cell  
1053 proportion values in each subject. Line represents average values across P and NP subjects. LMER  
1054 p-values are shown for P vs NP differences. **E-G.** Flow cytometry gating schemes **E.** DC subsets  
1055 and monocytes **F.** Th1 and Th2 cells **G.** NK cells.  
1056

1057 **Figure 6. Correlation of temporal changes between cell subsets and BTMs. A.** Heatmap showing  
1058 correlations between flow-cytometry derived cell subset counts from NK and DC panels  
1059 (columns) and BTM expression (rows) matched by participant and time-point. Red represents  
1060 positive correlation, blue represents negative correlation, and white represents non-significant  
1061 correlations. Regions of positive and negative correlation are numbered 1-7. **B,C.** Changes over  
1062 time (relative to day 0) of BTMs and cell subsets that are strongly positively correlated (**B**, blocks  
1063 1-4 in heatmap **A**) and negatively correlated (**C**, blocks 5-7 in heatmap **A**). Each line represents  
1064 average expression changes (relative to day 0) of a cell subset or BTM in P and NP subjects.  
1065

1066 **Figure 7. Validation of transcriptional changes of specific cell types using CITEseq data. A** Scatter  
1067 plot illustrating cell types identified in CITEseq data, visualized using uniform manifold  
1068 approximation and projection (UMAP). Each point represents a cell and is colored by cell type. **B**  
1069 Heatmap showing GSEA NES of CITEseq-derived cell signatures in whole-blood RNAseq in  
1070 response to the first immunization in P and NP subjects. **C.** Lineplot showing kinetics of CITEseq-  
1071 identified cell signatures in P and NP subjects. Each line represents the median gene expression  
1072 levels of a CITEseq gene signature per-subject, and the black dashed line represents the median  
1073 gene expression levels across all in P or NP subjects. **D.** Heatmap showing Spearman's rank  
1074 correlation between cell-type specific BTMs and CITEseq identified cell-specific signatures. The  
1075 color row bar indicates cell-type annotation of BTMs.  
1076

1077

1078

1079

1080

1081

1082

1083

1084

1085 **Supplementary Material**

1086

1087 **Figure S1. Overview of the IMRAS trial.** **A.** Schematic indicating timing of vaccination and  
1088 sampling. **B.** Kaplan-Meier curve showing the percentage of true immunized subjects who did not  
1089 develop parasitemia after CHMI (green) and those who did (red). **C.** Number of infectious  
1090 mosquito bites received by each subject at each immunization. Circles and triangles indicate non-  
1091 protected and protected subjects, respectively. Red lines indicate the median number of  
1092 infectious mosquito bites.

1093

1094 **Figure S2. Comparison of protection associated clusters P\_1 and NP\_1.** **A,B.** Gene overlap of IPA  
1095 pathways and BTMs enriched in cluster P\_1 (**A**) and NP\_1 (**B**), Node sizes indicate numbers of  
1096 genes in a BTM or IPA pathway, and line thickness indicates the numbers of shared genes  
1097 between two nodes. **C.** Heatmap showing expression of 317 genes common in cluster 1 of P  
1098 subjects and cluster 1 of NP subjects. Expression values were z-score transformed in rows for  
1099 visualization.

1100

1101 **Figure S3. Expression changes in pattern-recognition receptor pathways.** **A,B** Heat maps of  
1102 expression changes for MyD88-dependent toll-like receptor associated genes (**A**) and MyD88-  
1103 independent toll-like receptor associated genes (**B**) in P and NP subjects. Genes shown were  
1104 selected using Gene-ontology (GO) annotations GO:0002755 (MyD88 dependent TLR signalling  
1105 pathway) and GO:0002756 (MyD88 independent TLR signalling pathway). Expression values were  
1106 Z-score transformed in rows for visualization. **C.** Average gene expression of selected IPA  
1107 pathways over time in P (green) and NP (red) subjects. Dots represent average gene expression  
1108 values per-individuals and solid line represents the average gene expression of the IPA pathway  
1109 across all participants.

1110

1111 **Figure S4. Expanded color legend showing IPA pathways and BTMs enriched in Fig. 2**

1112

1113 **Figure S5. Expression changes in reactive-oxygen species pathway genes.** **A.** Heatmap showing  
1114 expression of Hallmark Reactive Oxygen Species (ROS) Pathway genes. Expression values were z-  
1115 score transformed in rows for visualization. **B.** STRING-DB derived protein-protein interaction  
1116 networks of ROS genes, colored by expression changes on day 1 compared to day 0 separately  
1117 for P and NP. **C.** Average expression profiles of genes of Hallmark Reactive Oxygen Species  
1118 Pathway in P and NP subjects. Dots represent average expression in individuals and solid line  
1119 represents the average expression of the pathway over all P or NP subjects.

1120

1121 **Figure S6. Expression changes in pathways associated with specific immune cell types: A-**  
1122 **I.** Heatmaps showing expression of genes of cell-type specific pathways: Neutrophils (**A**),

1123 Monocytes (**B**), DCs (**C**), Platelets (**D**), T-cells (**E**), B cells (**F**), NK cells (**G**), classically activated  
1124 macrophages (**H**) and alternatively activated macrophages (**I**). Expression values were z-score  
1125 transformed in rows for visualization.

1126

1127 **Table S1.** Genes and pathways associated with hierarchical clustering of protection-associated  
1128 genes

1129

1130 **Table S2.** List of antibodies used for high parameter flow cytometry. Three separate staining  
1131 panels for the detection of DC subsets, monocytes, T cells and NK cells are shown.

1132

1133 **Table S3:** List of CITEseq antibodies

1134



A

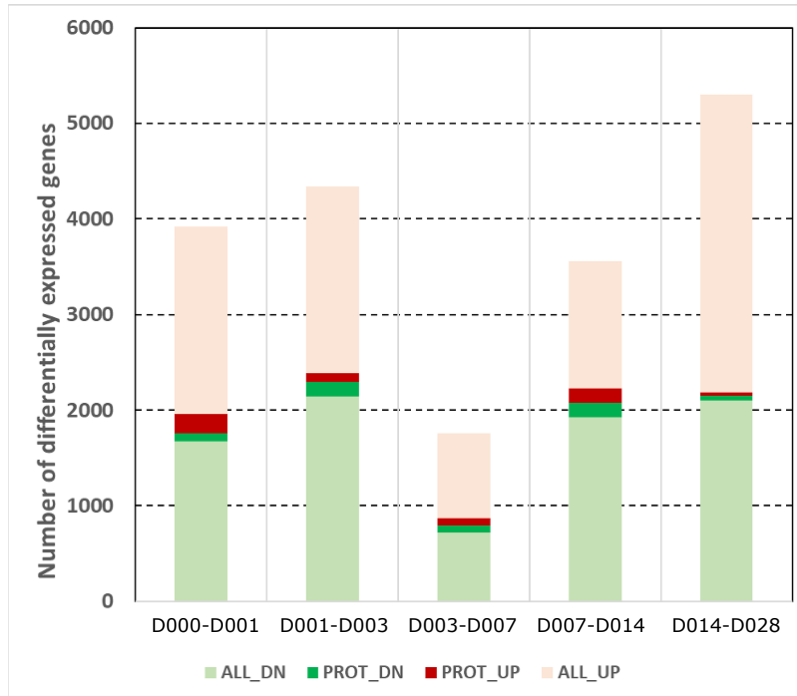

| INTERVAL         | ALL_UP | ALL_DN | PROT_UP | PROT_DN |
|------------------|--------|--------|---------|---------|
| D000-D001        | 1961   | 1669   | 208     | 84      |
| D001-D003        | 1956   | 2138   | 91      | 152     |
| D003-D007        | 885    | 714    | 76      | 81      |
| D007-D014        | 1330   | 1925   | 148     | 151     |
| D014-D028        | 3113   | 2103   | 36      | 45      |
| #of unique genes | 8170   |        | 806     |         |

B

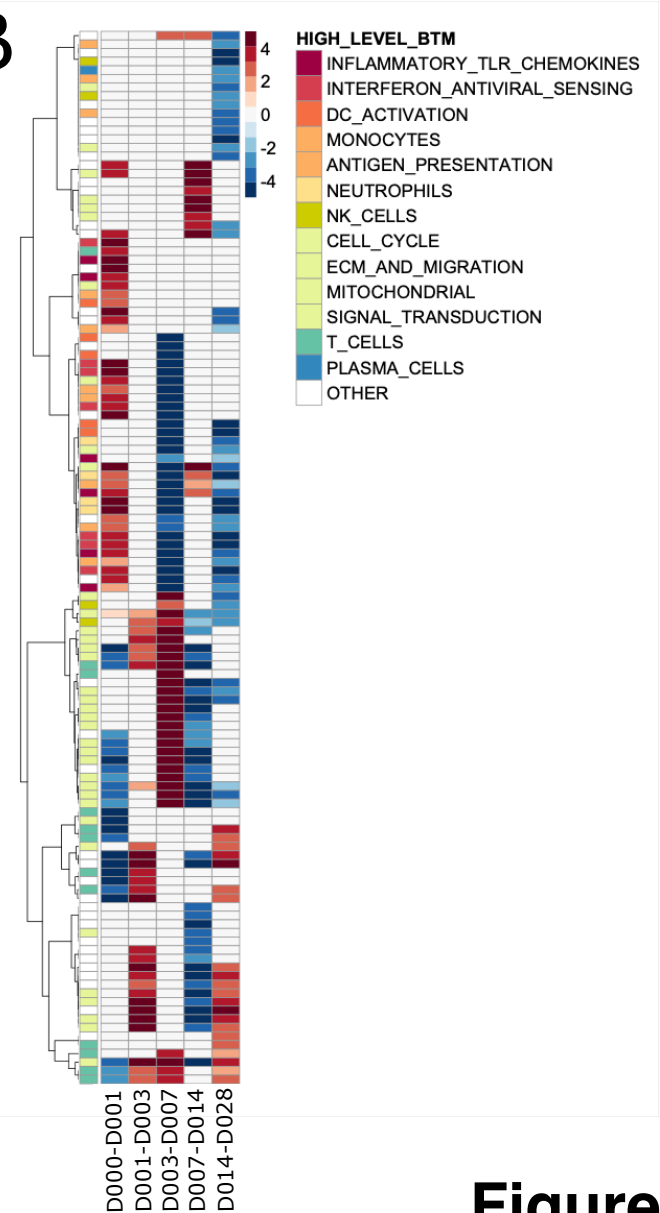

Figure 1

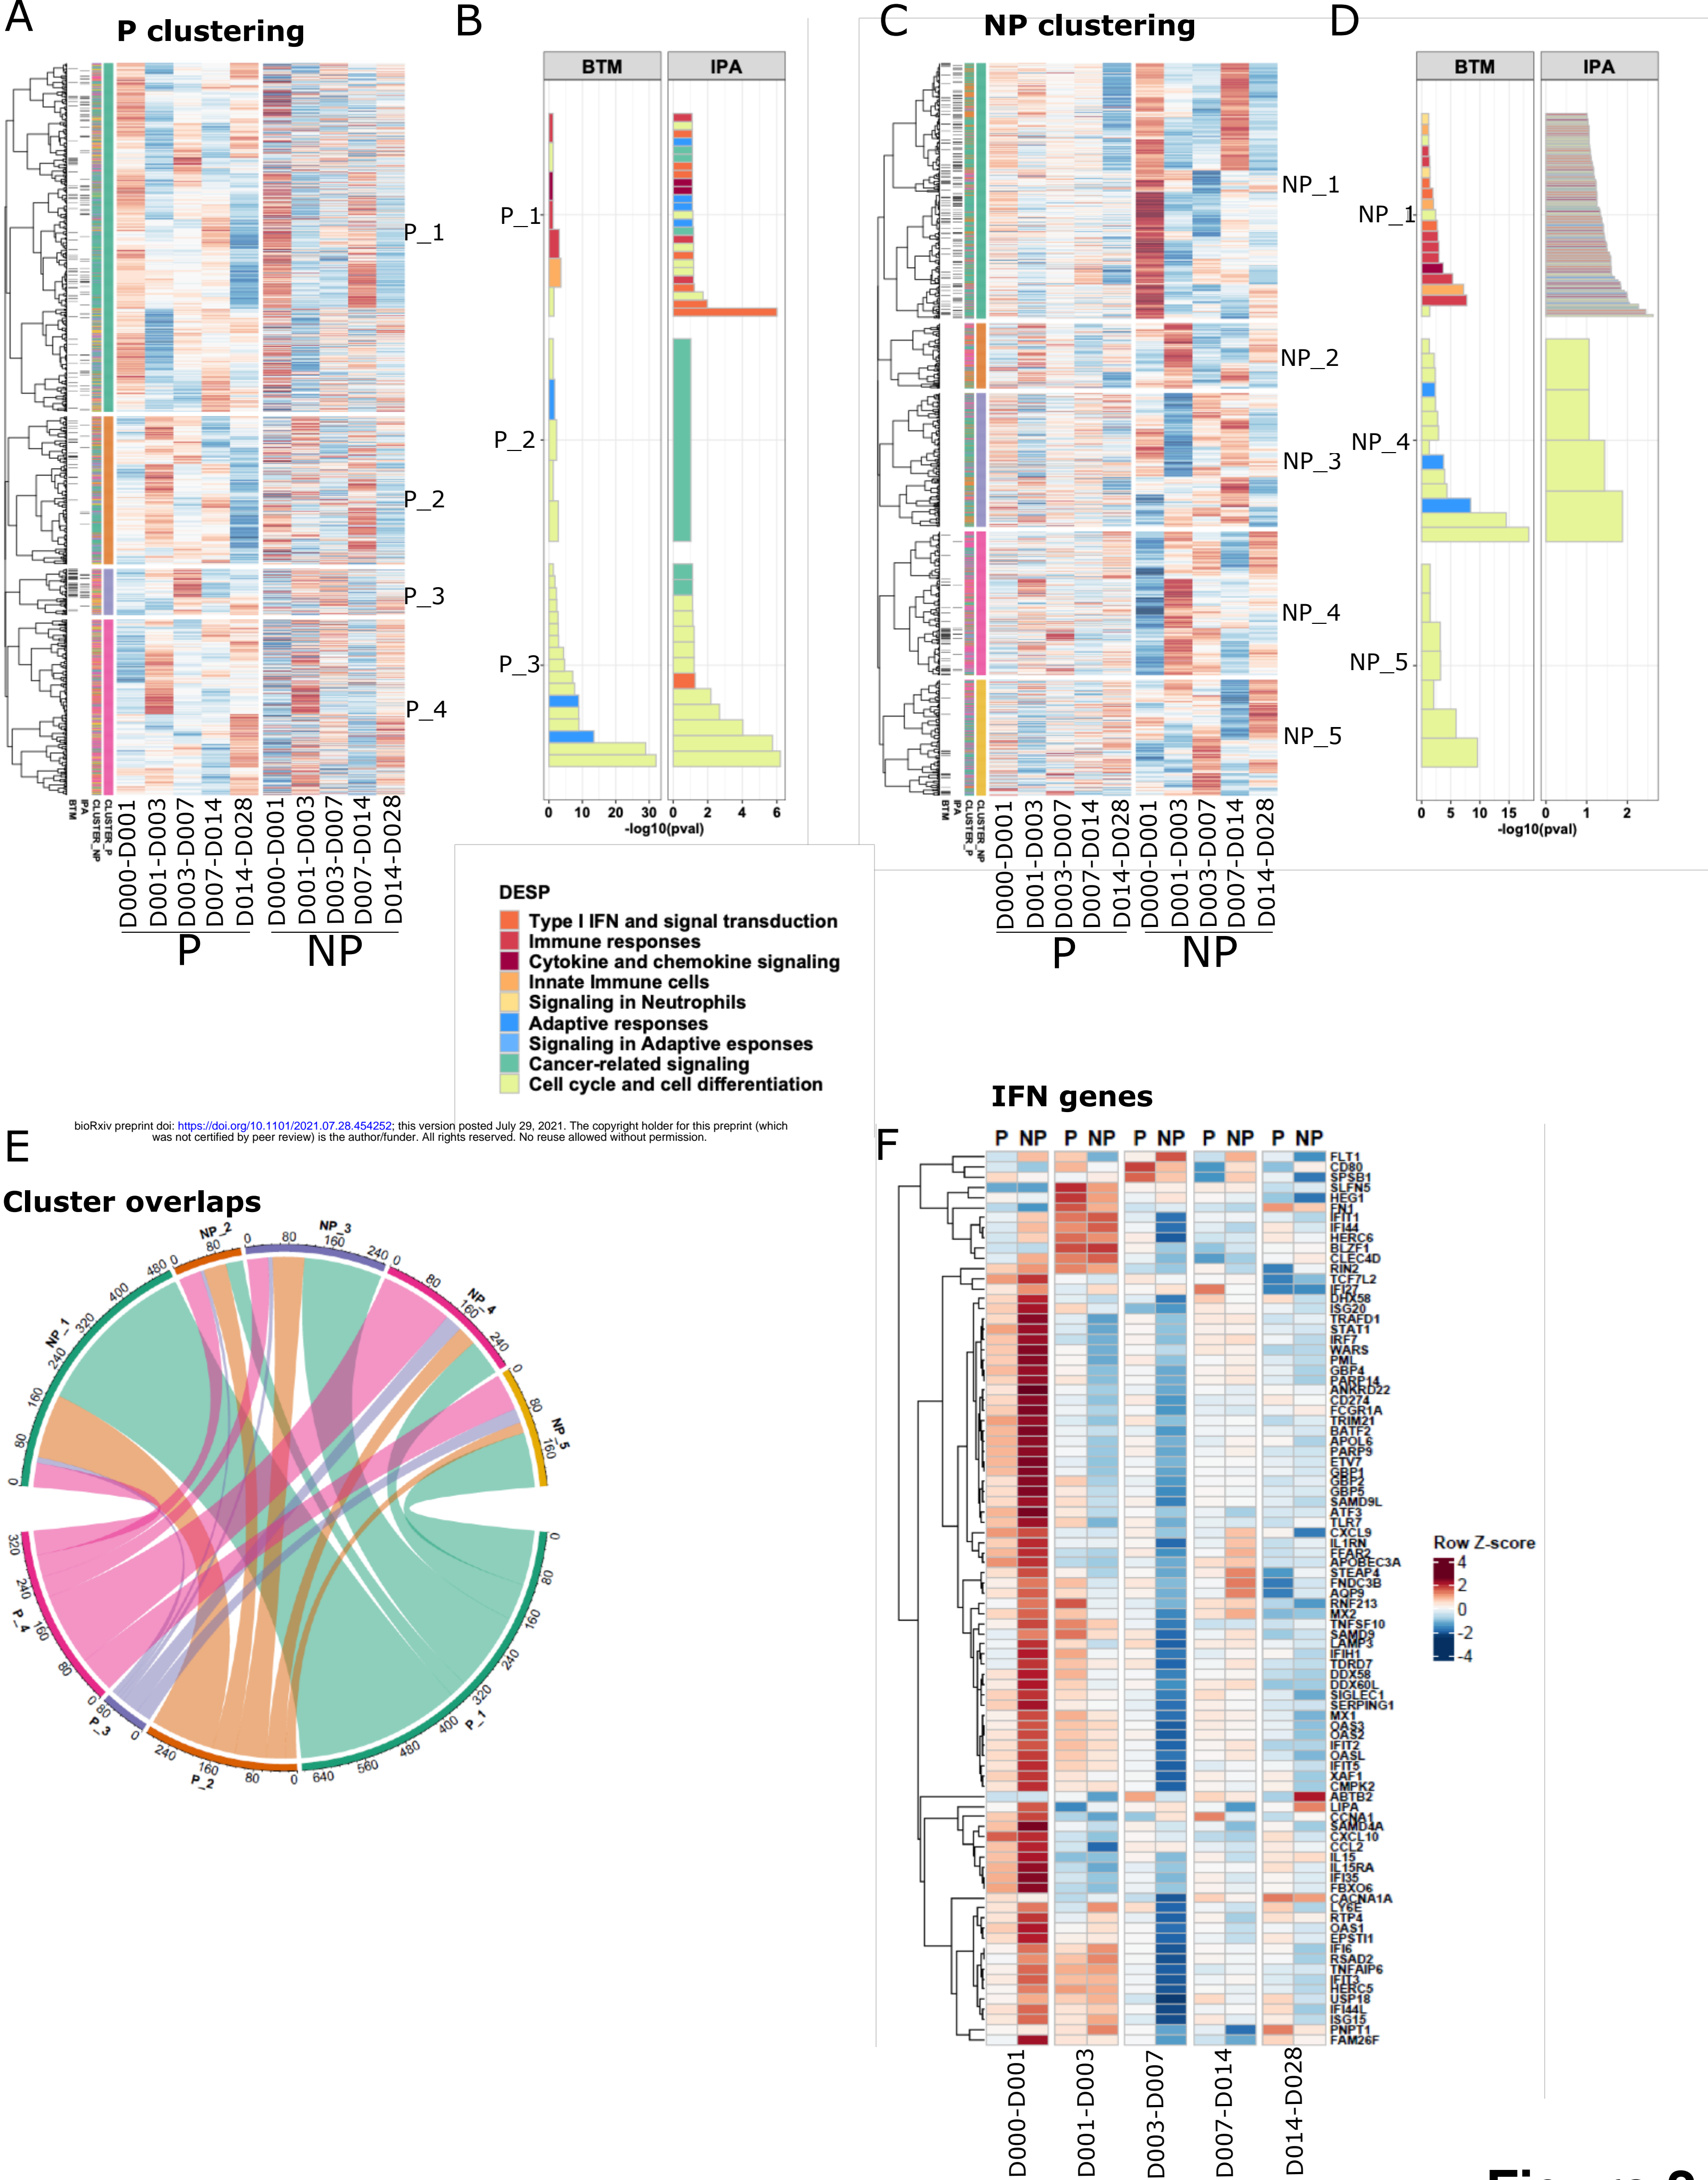

**Figure 2**

A

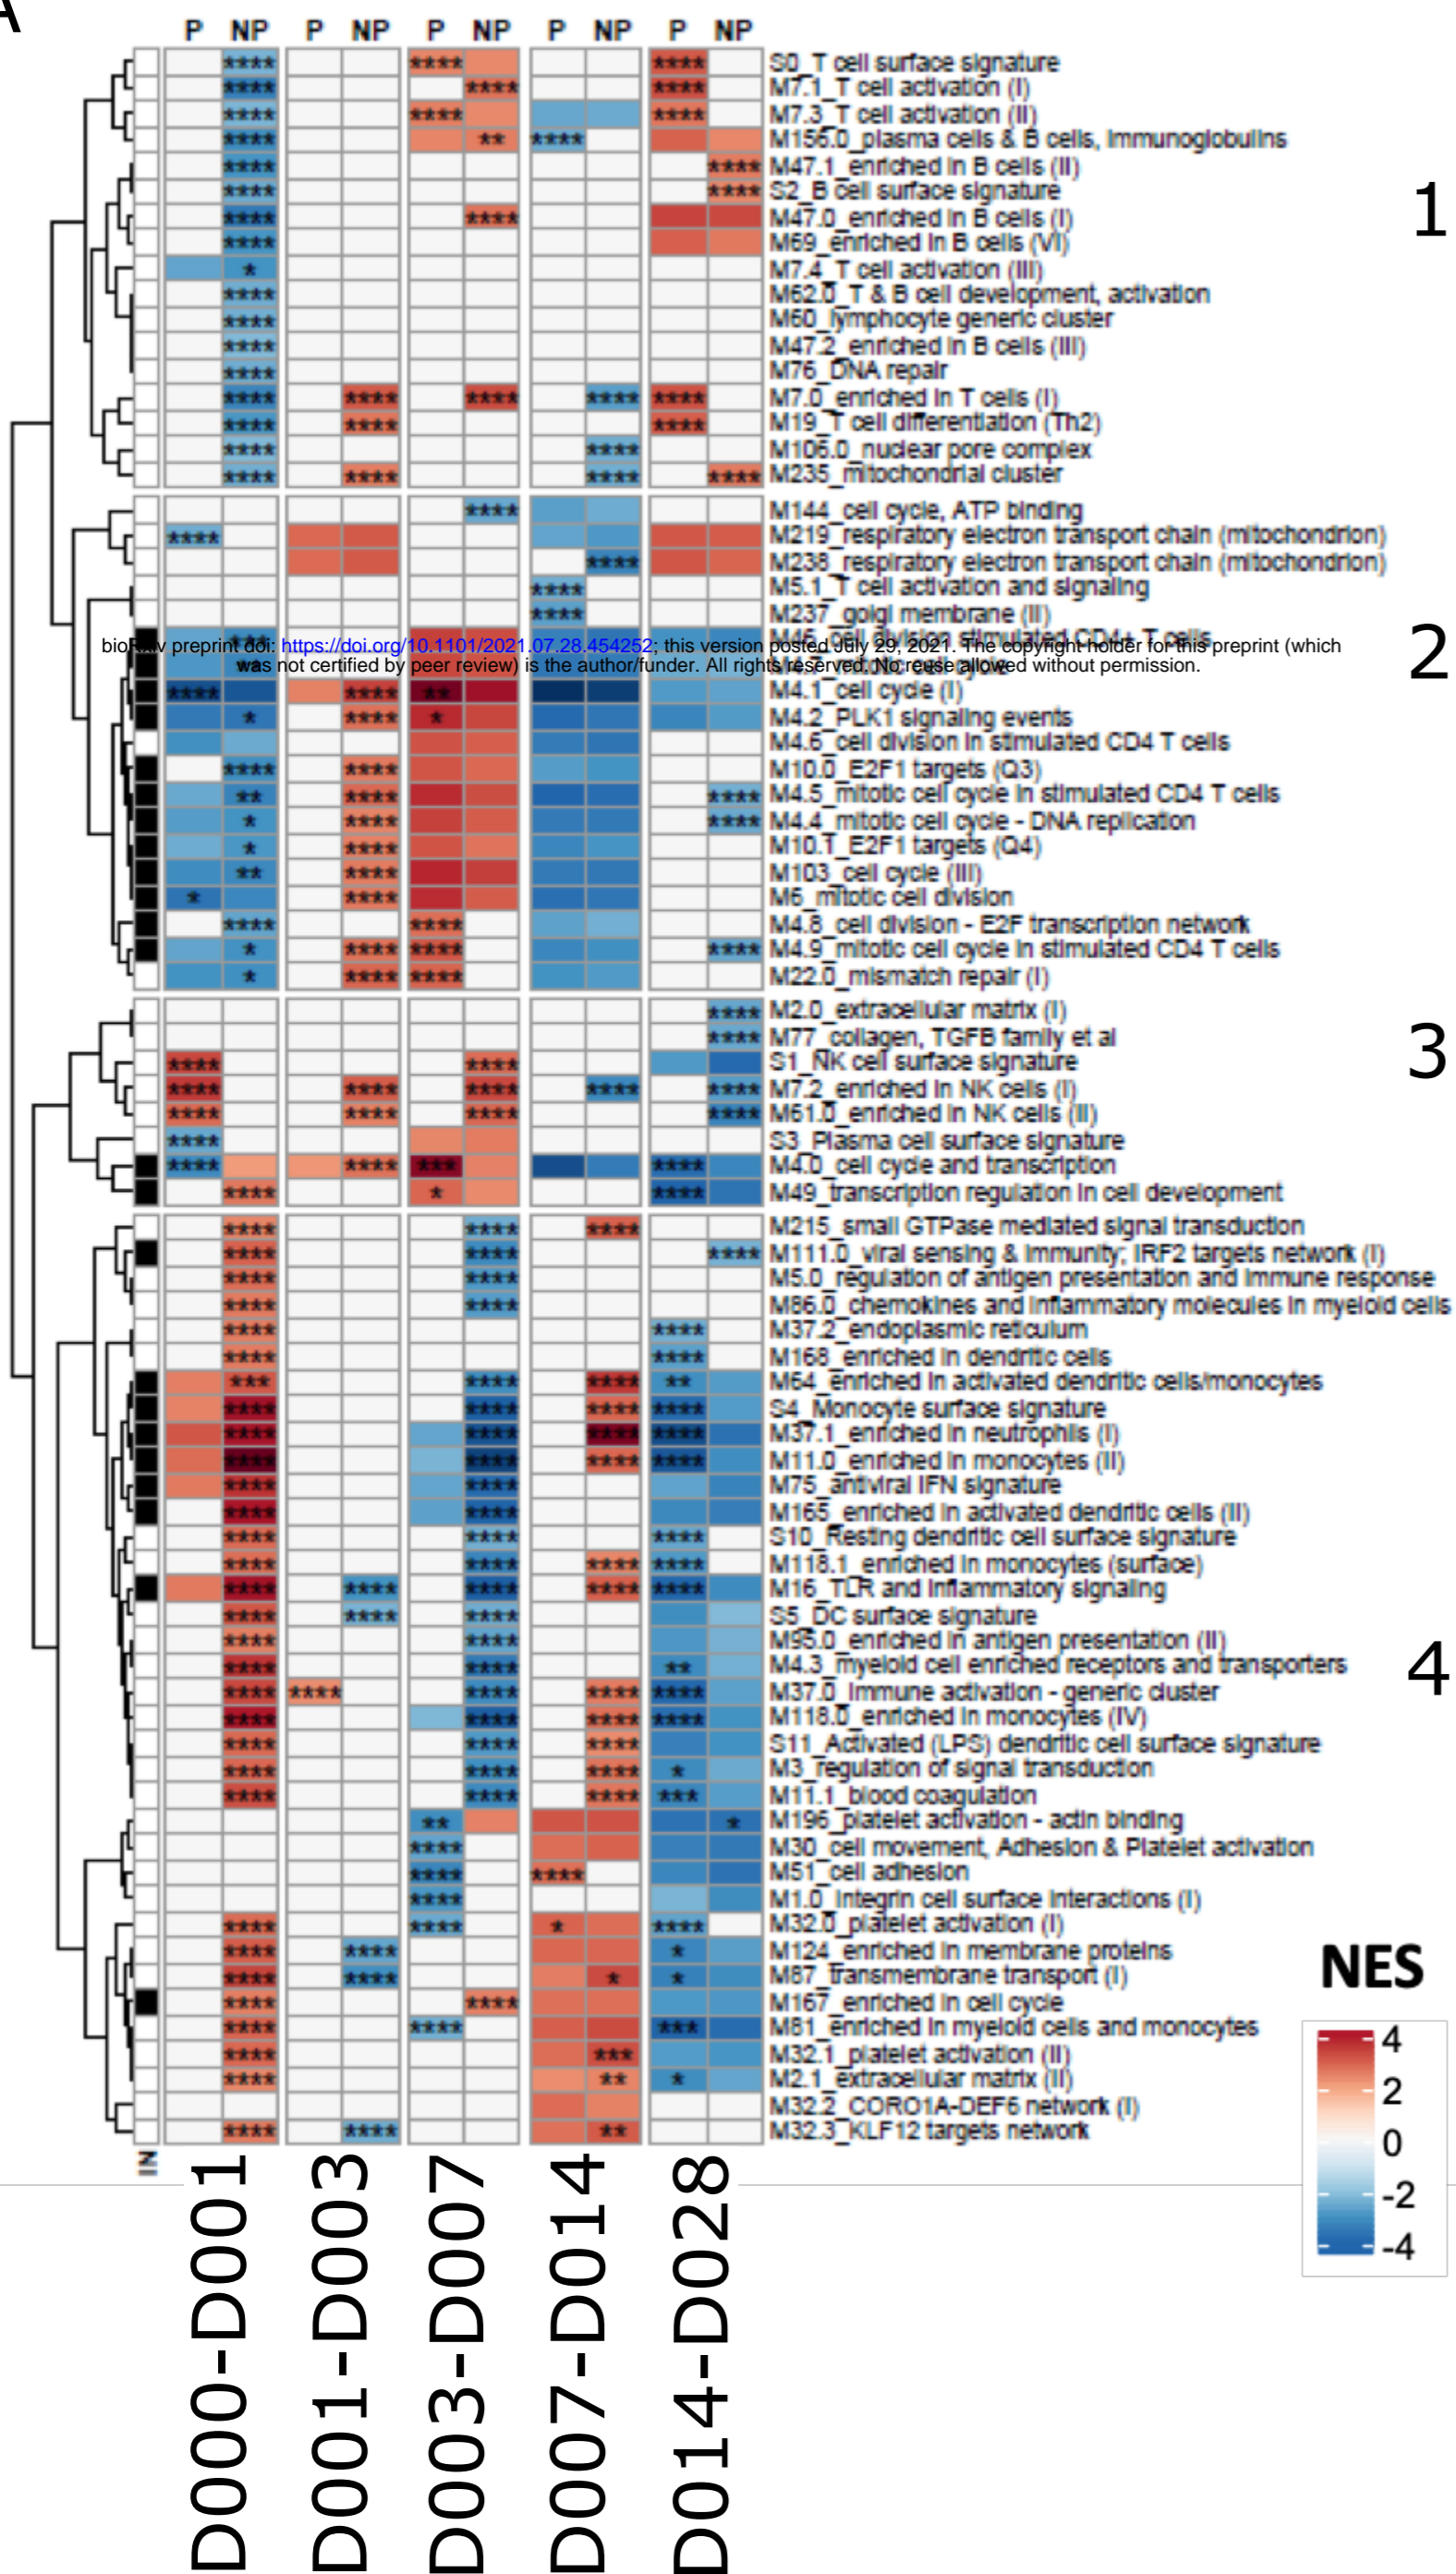

B

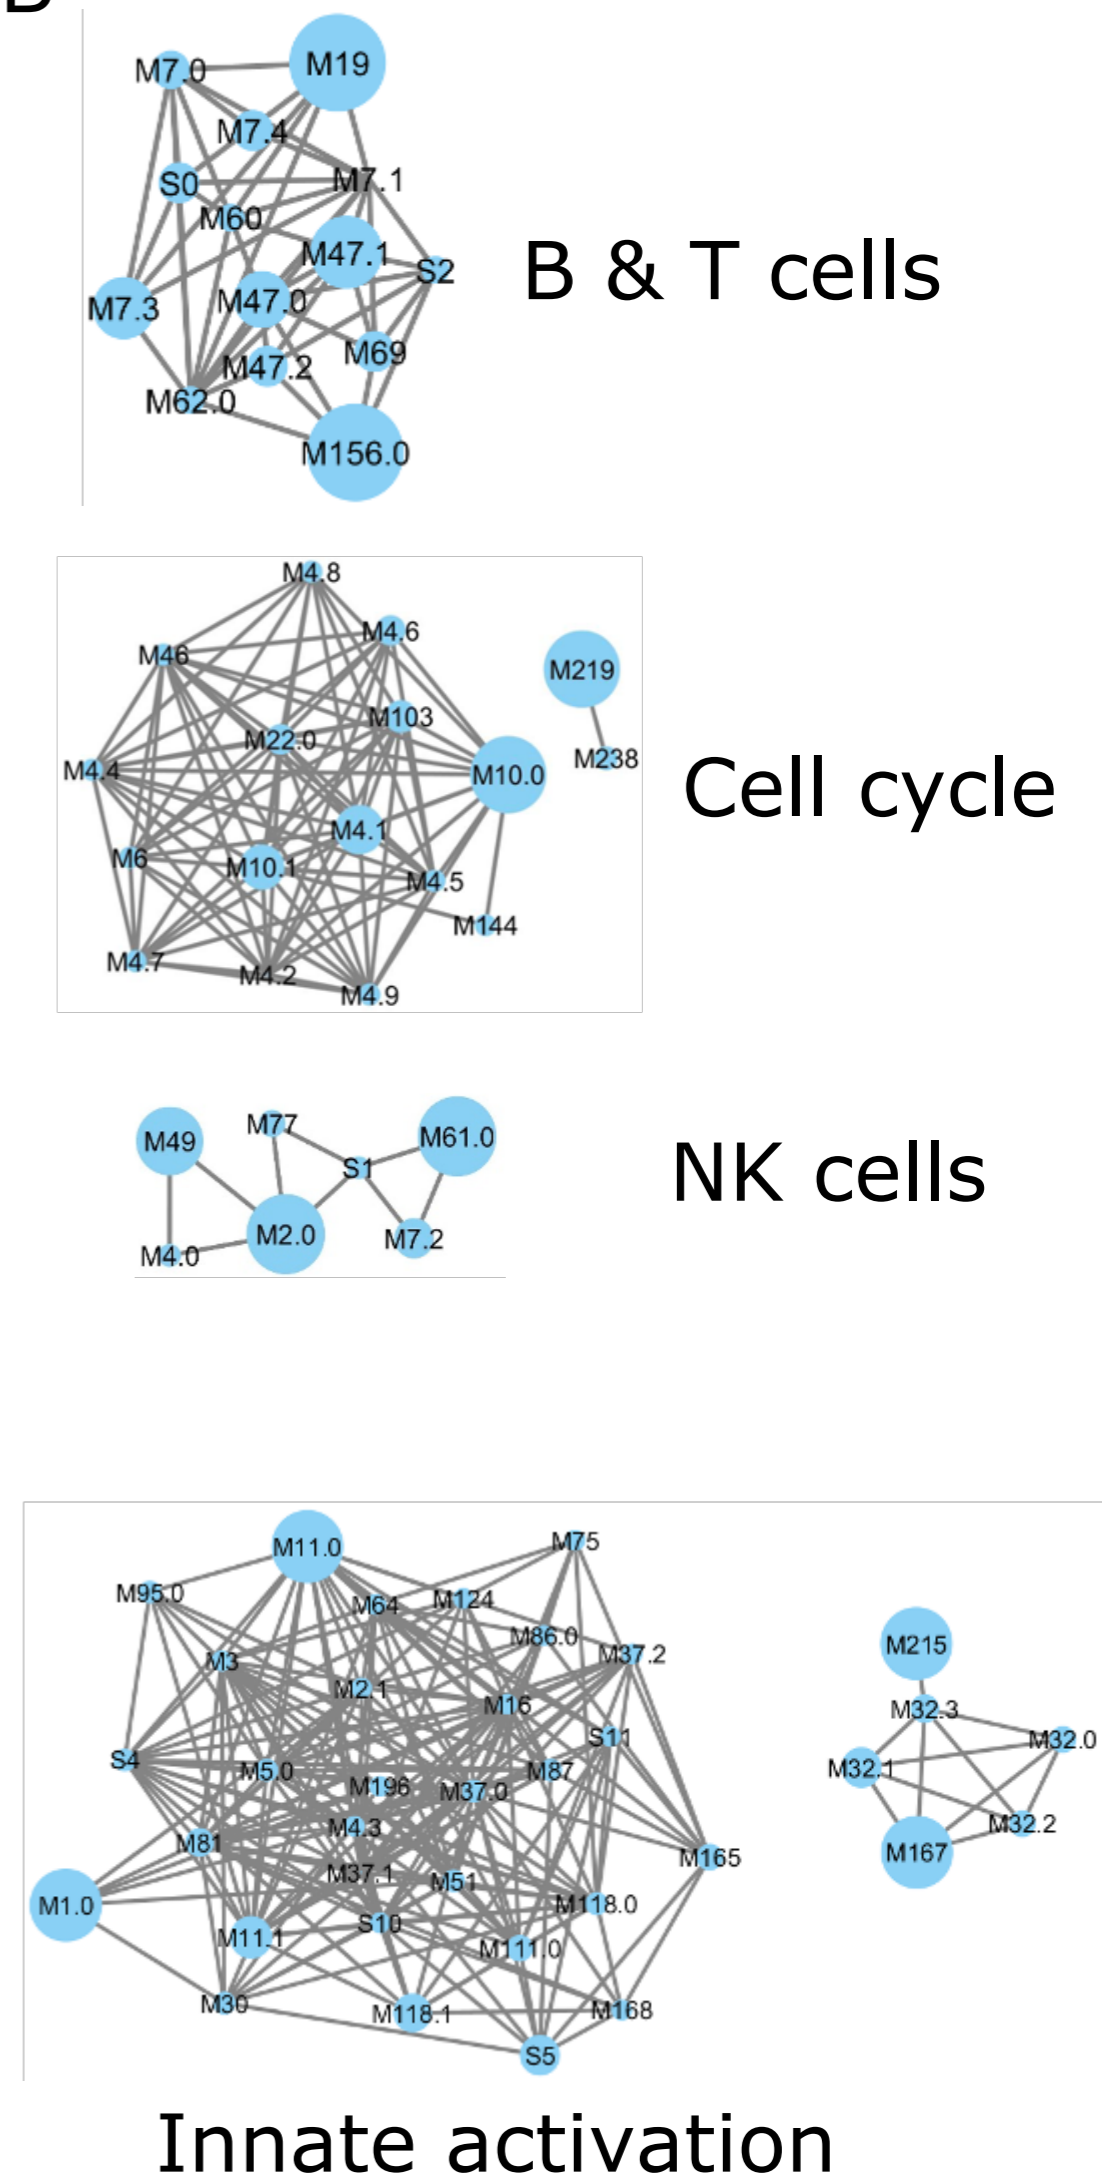

Figure 3

A

## Cell type BTMs

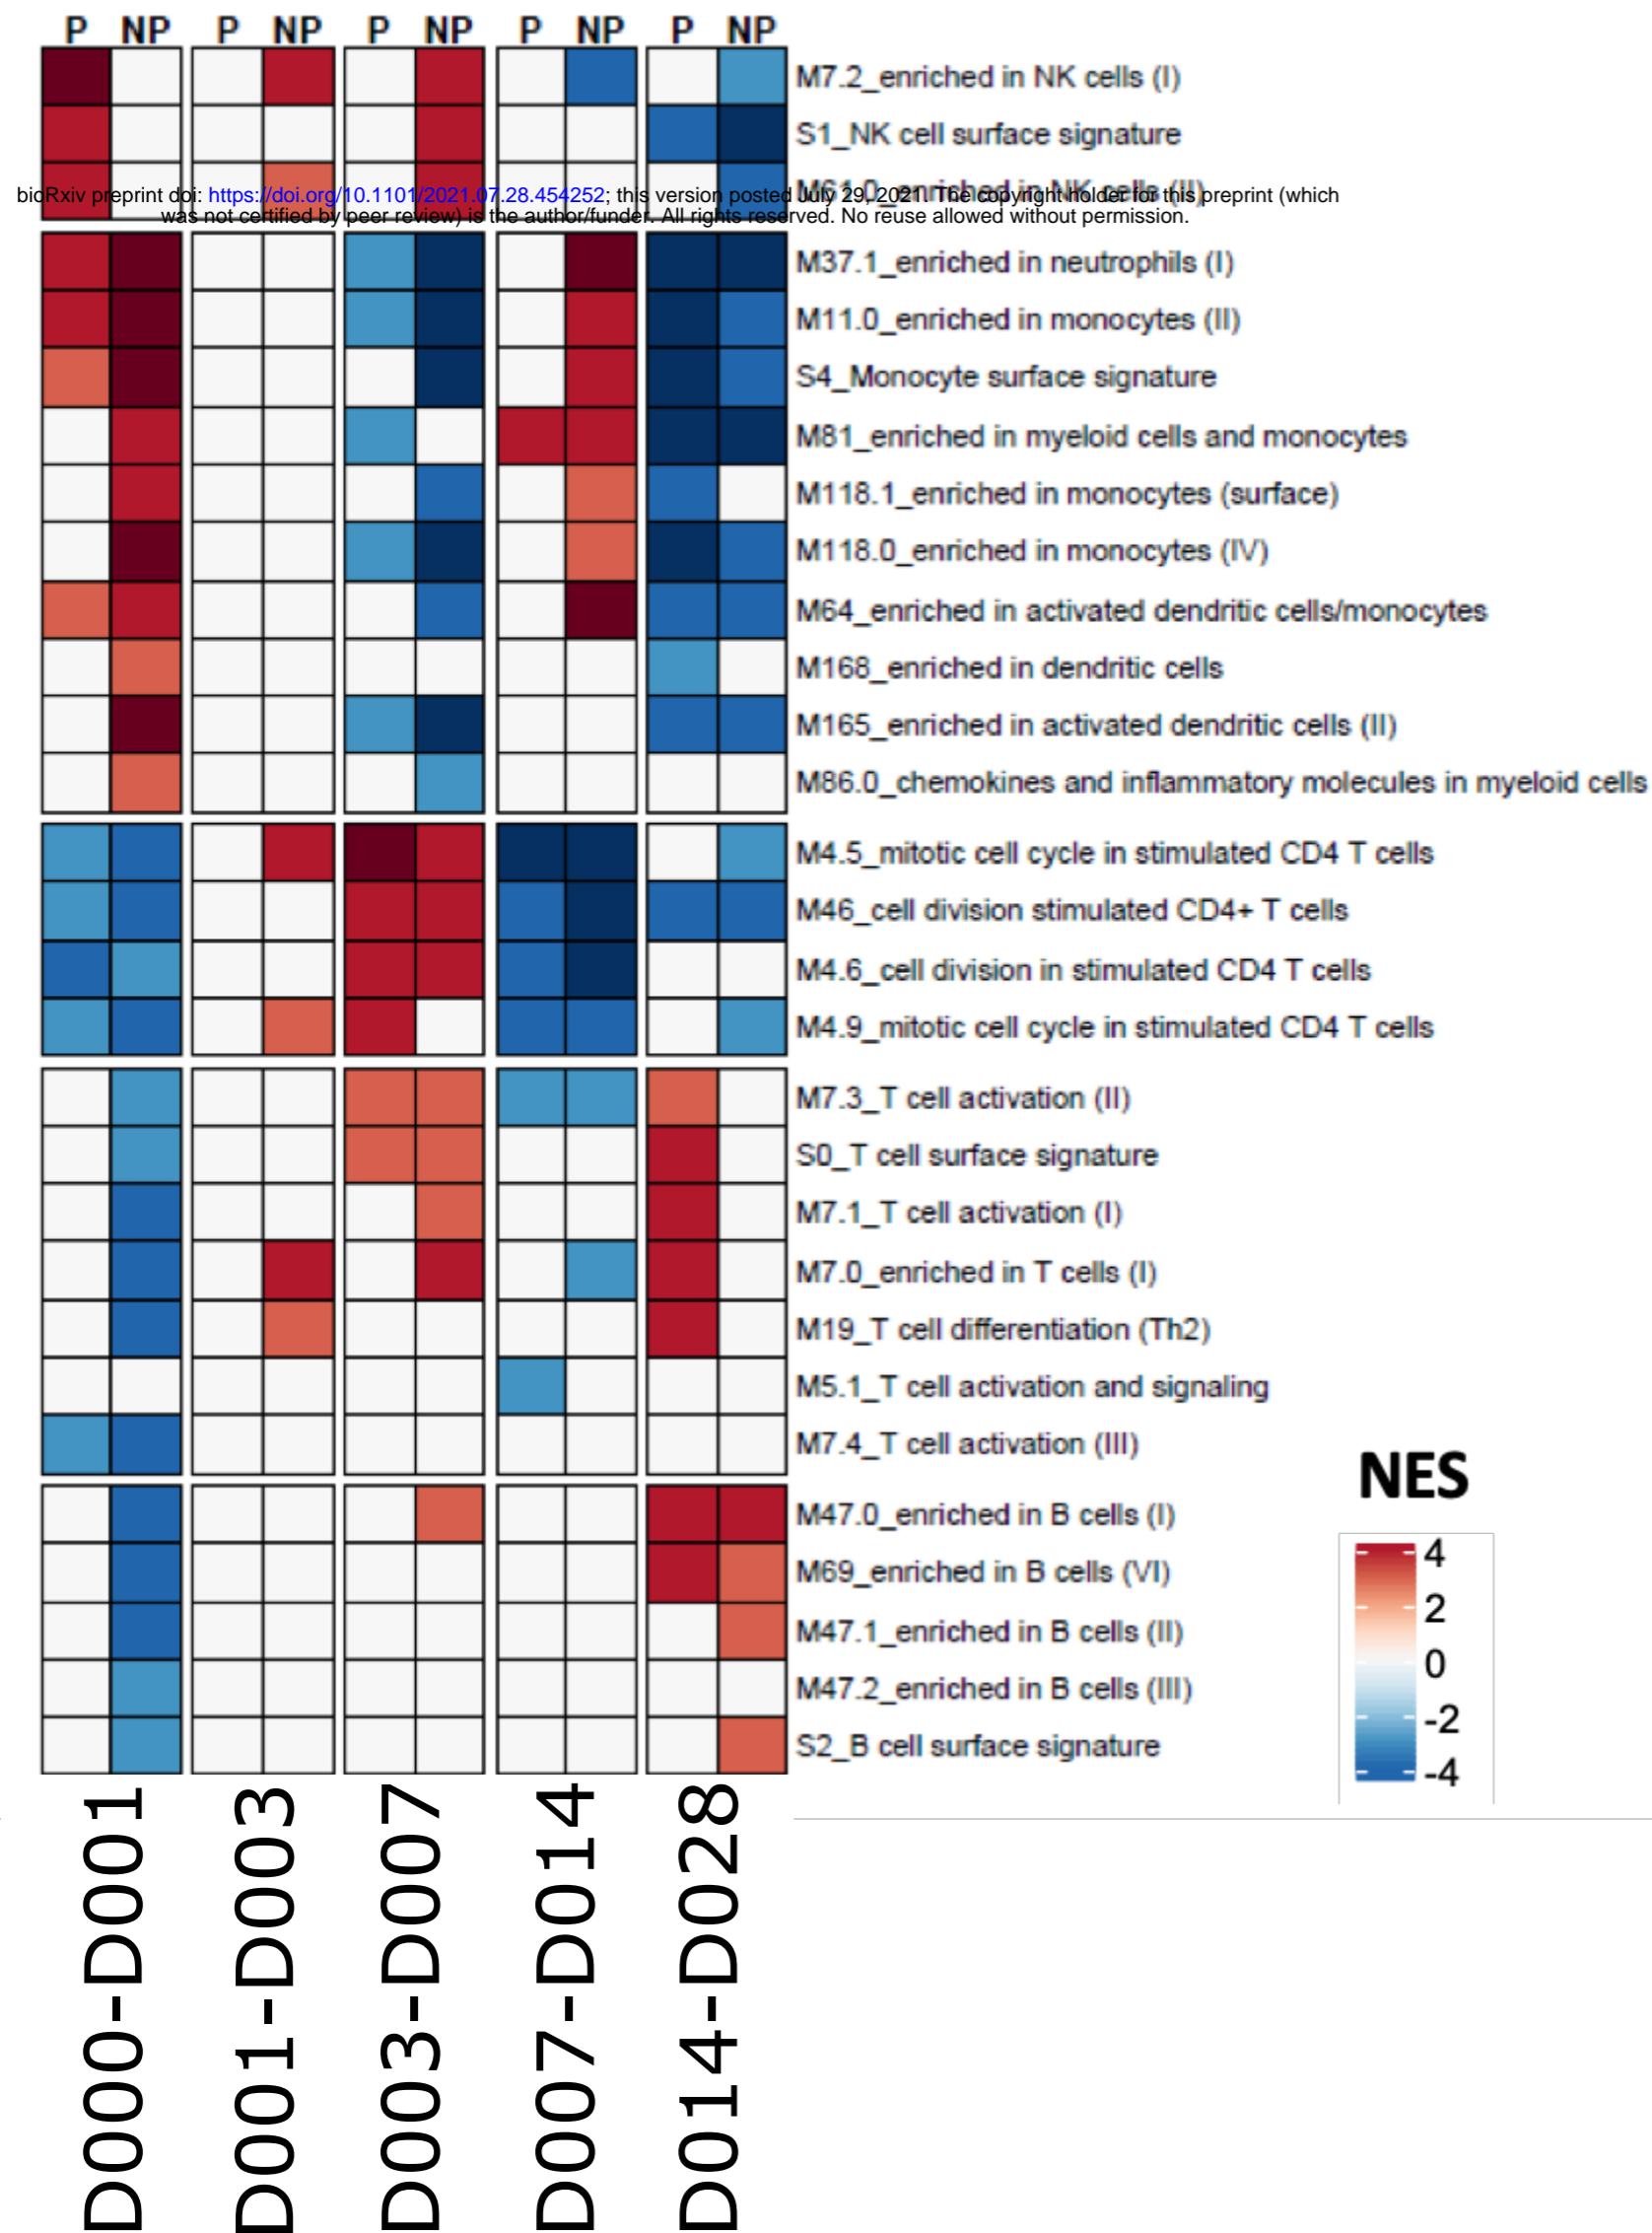

B

## Neutrophil genes

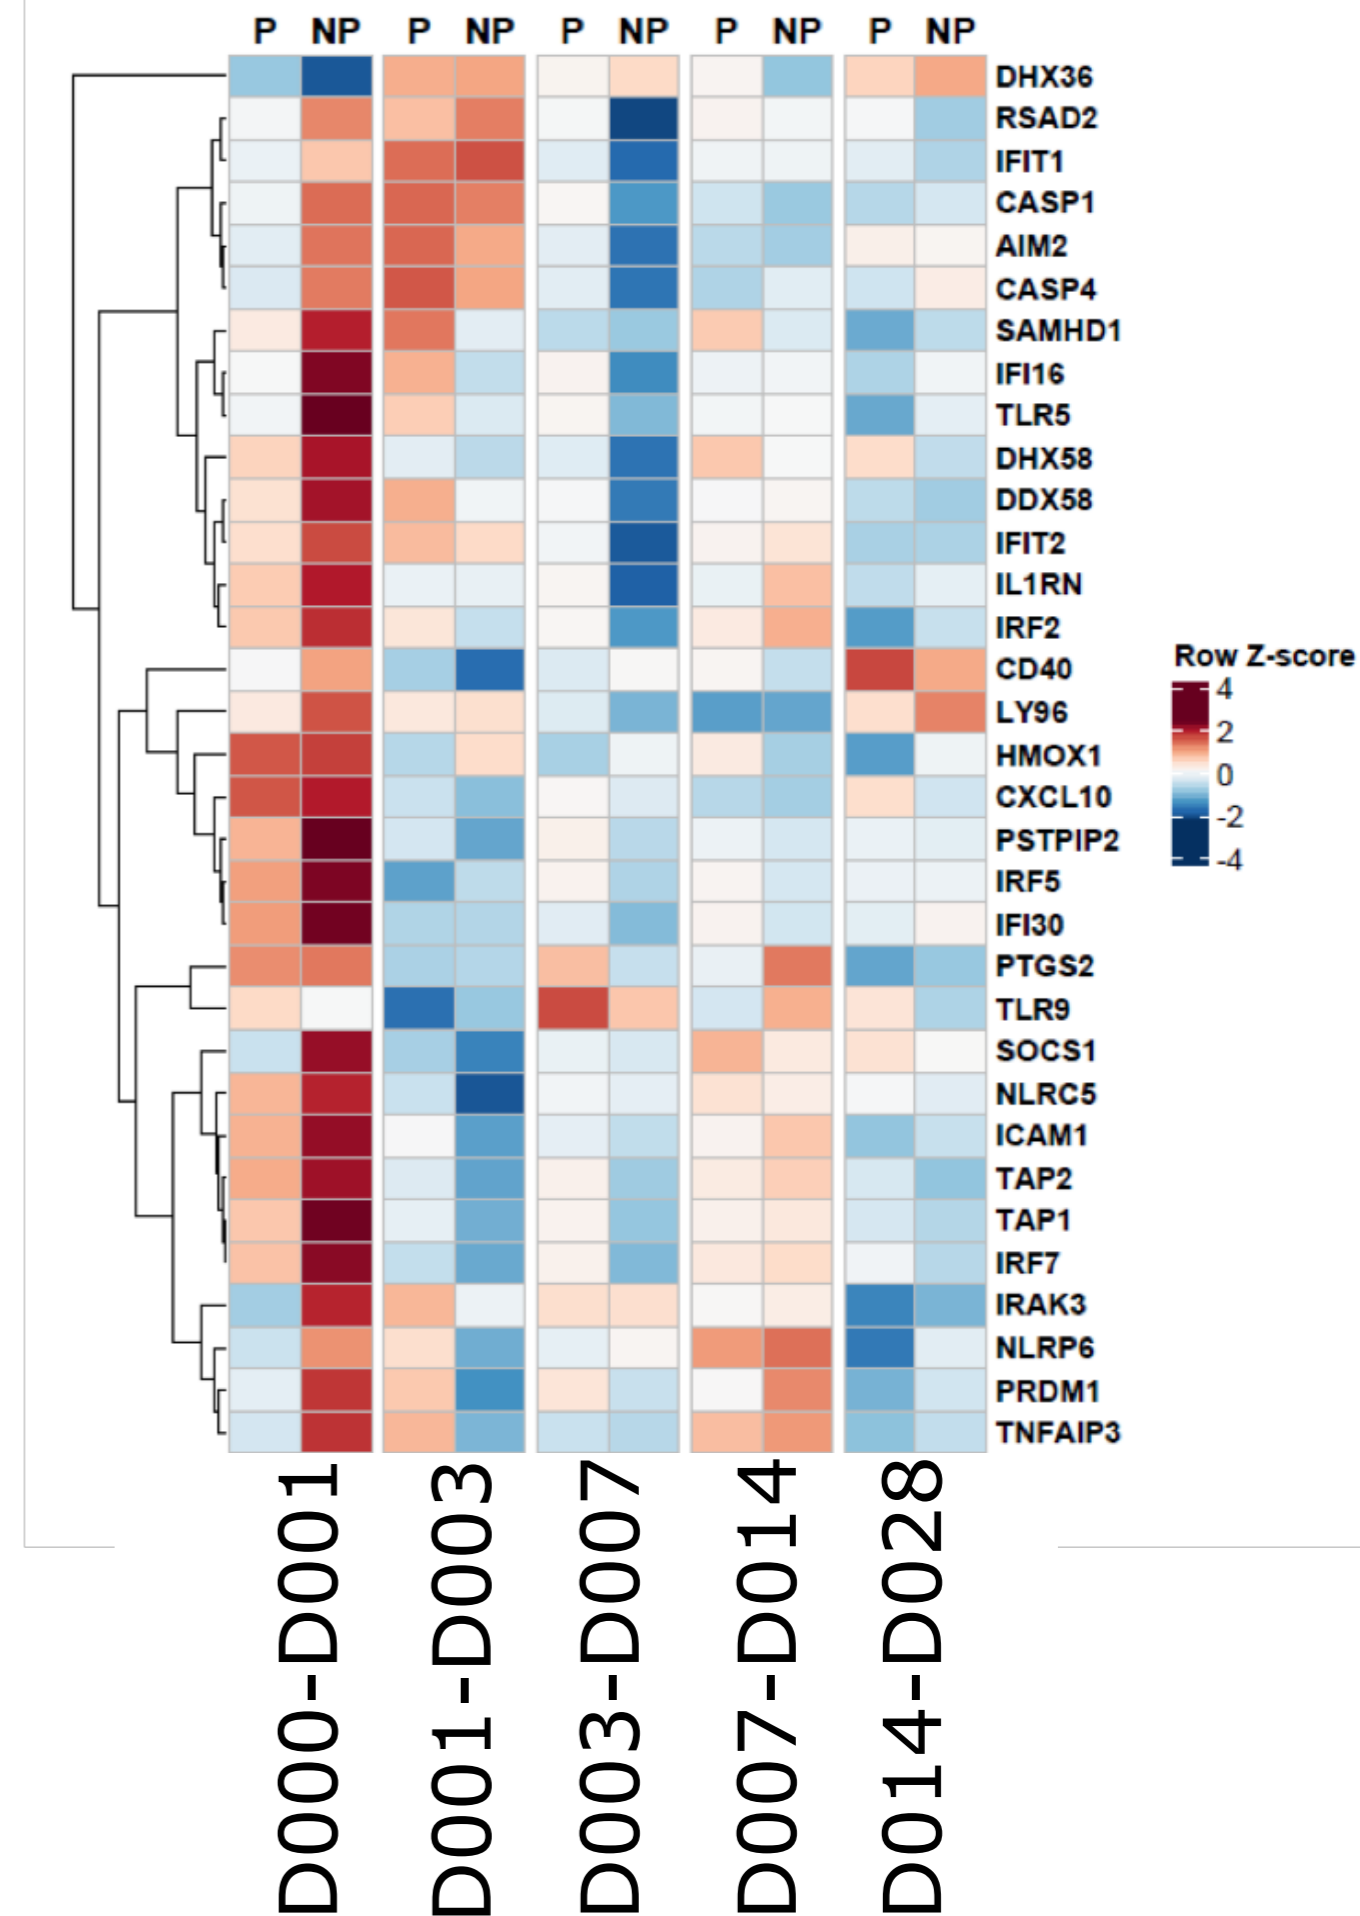

Figure 4

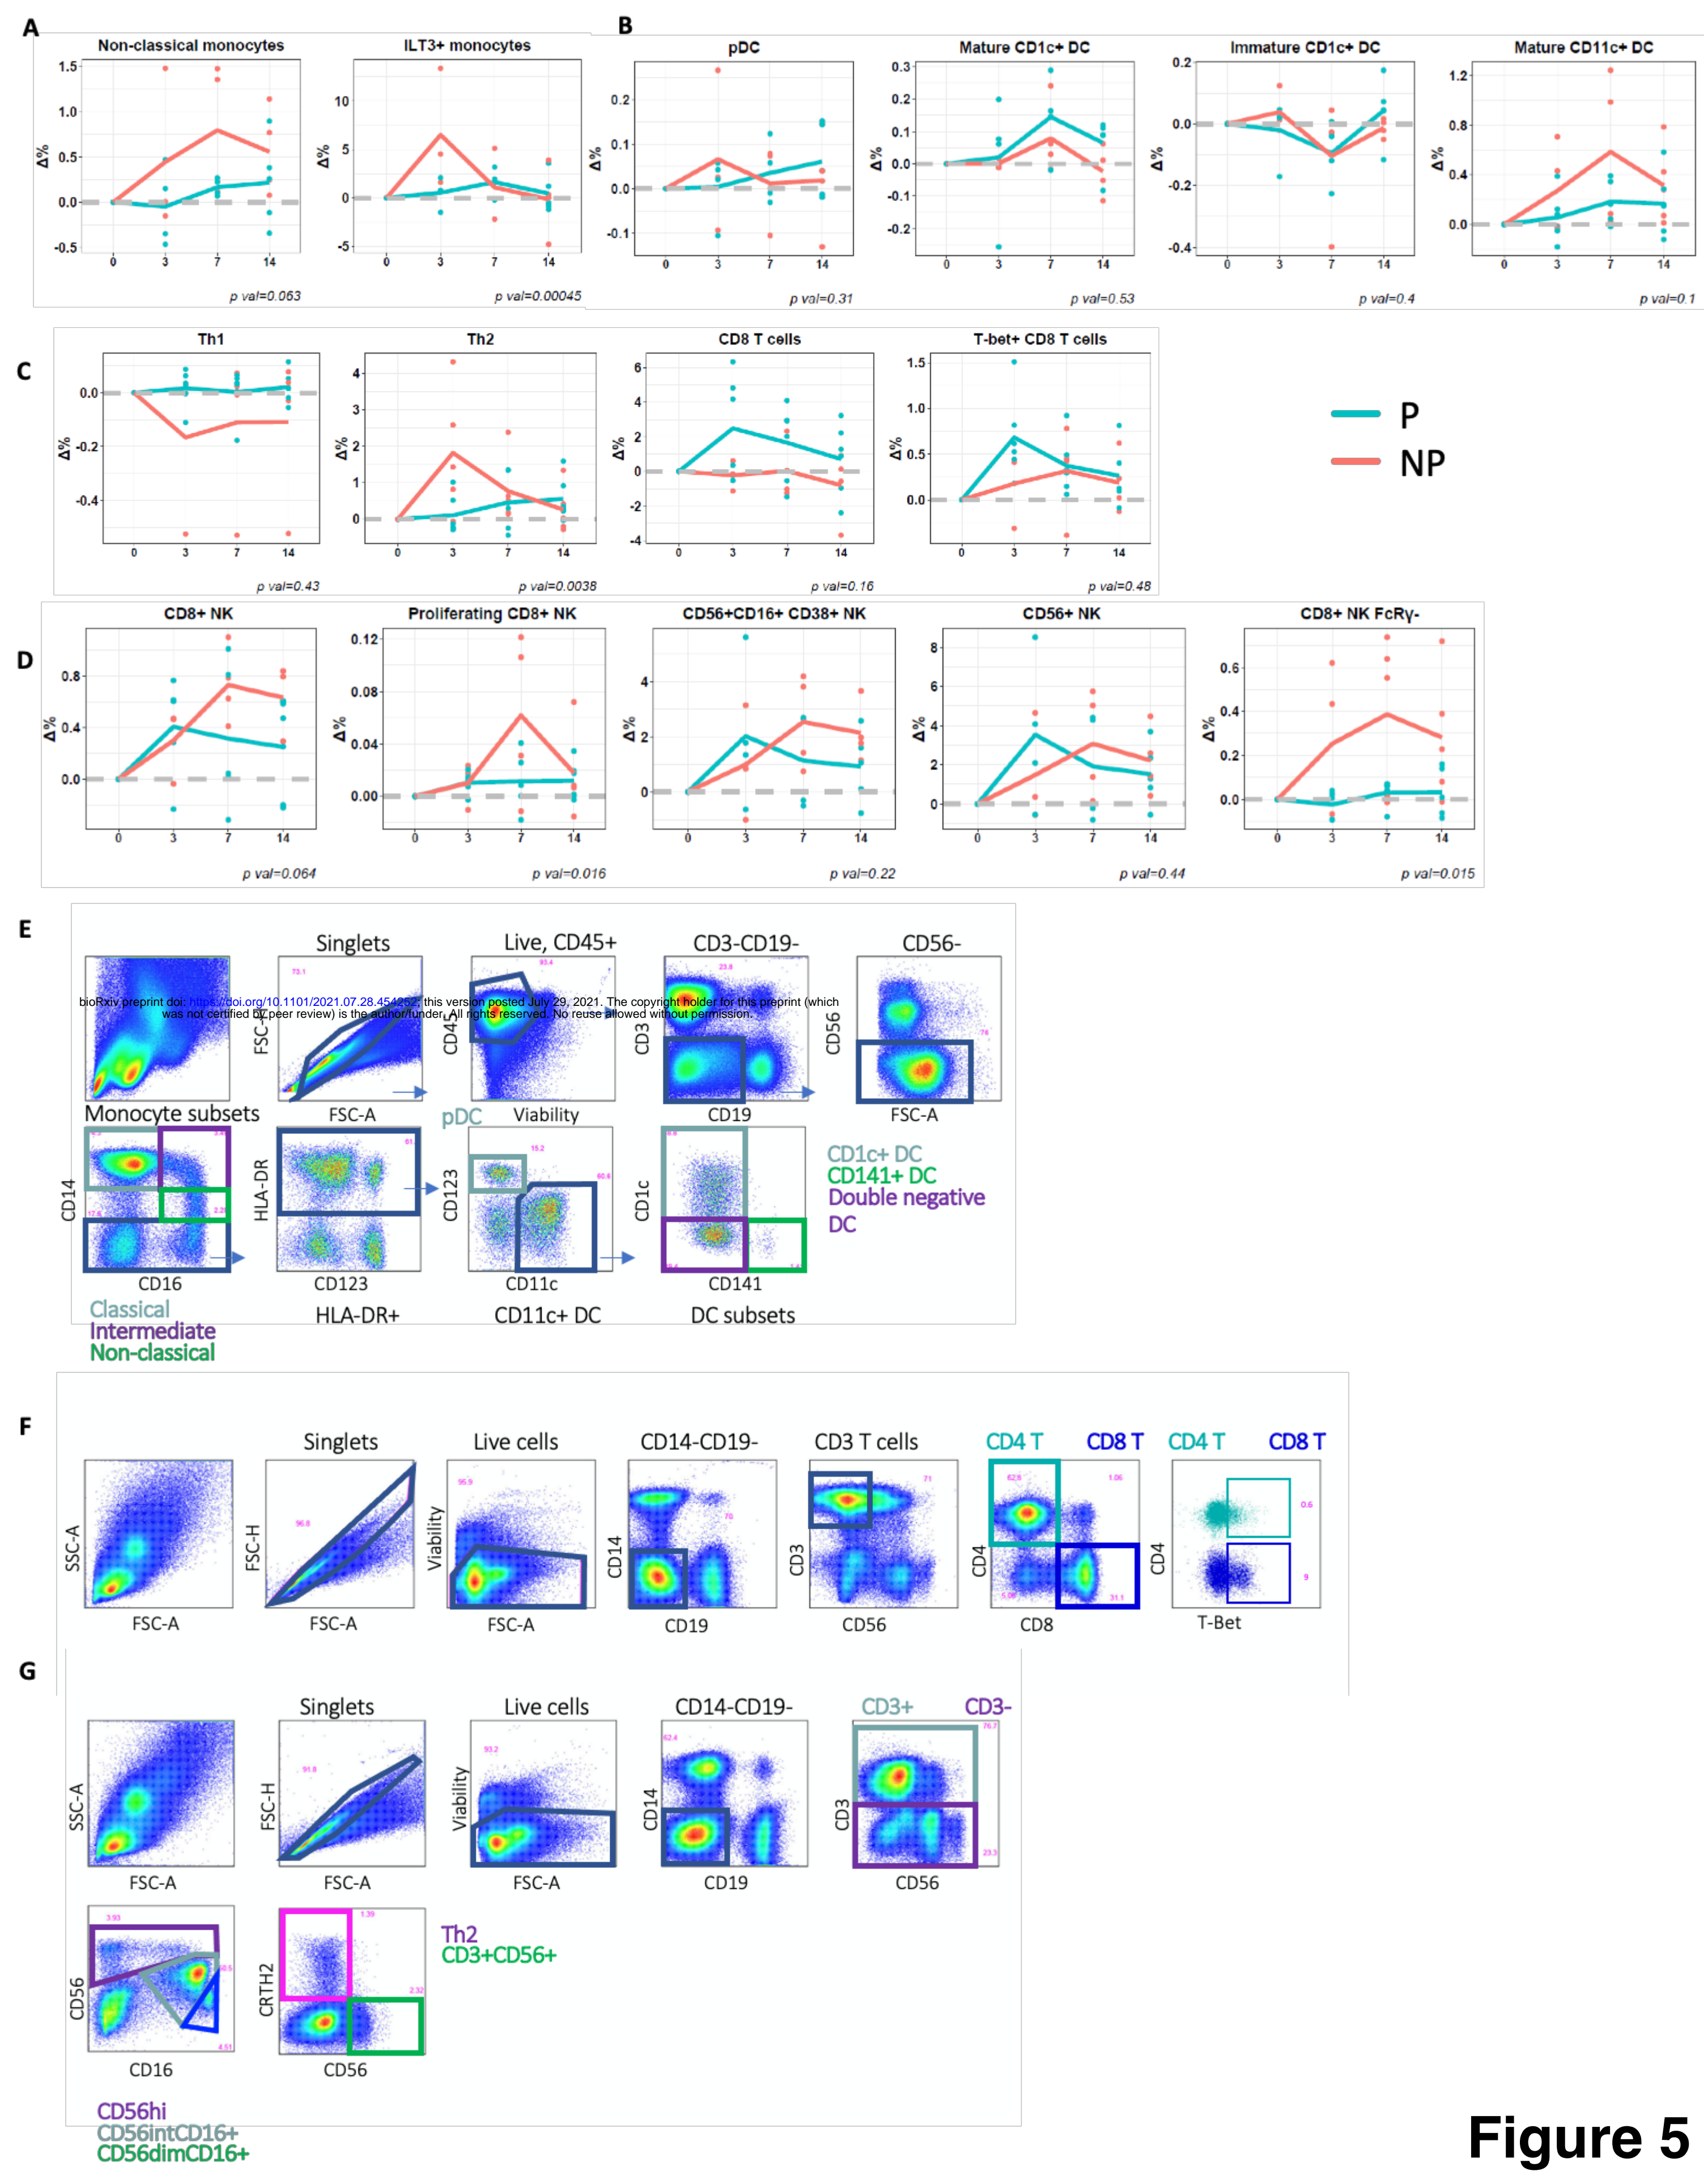

**A**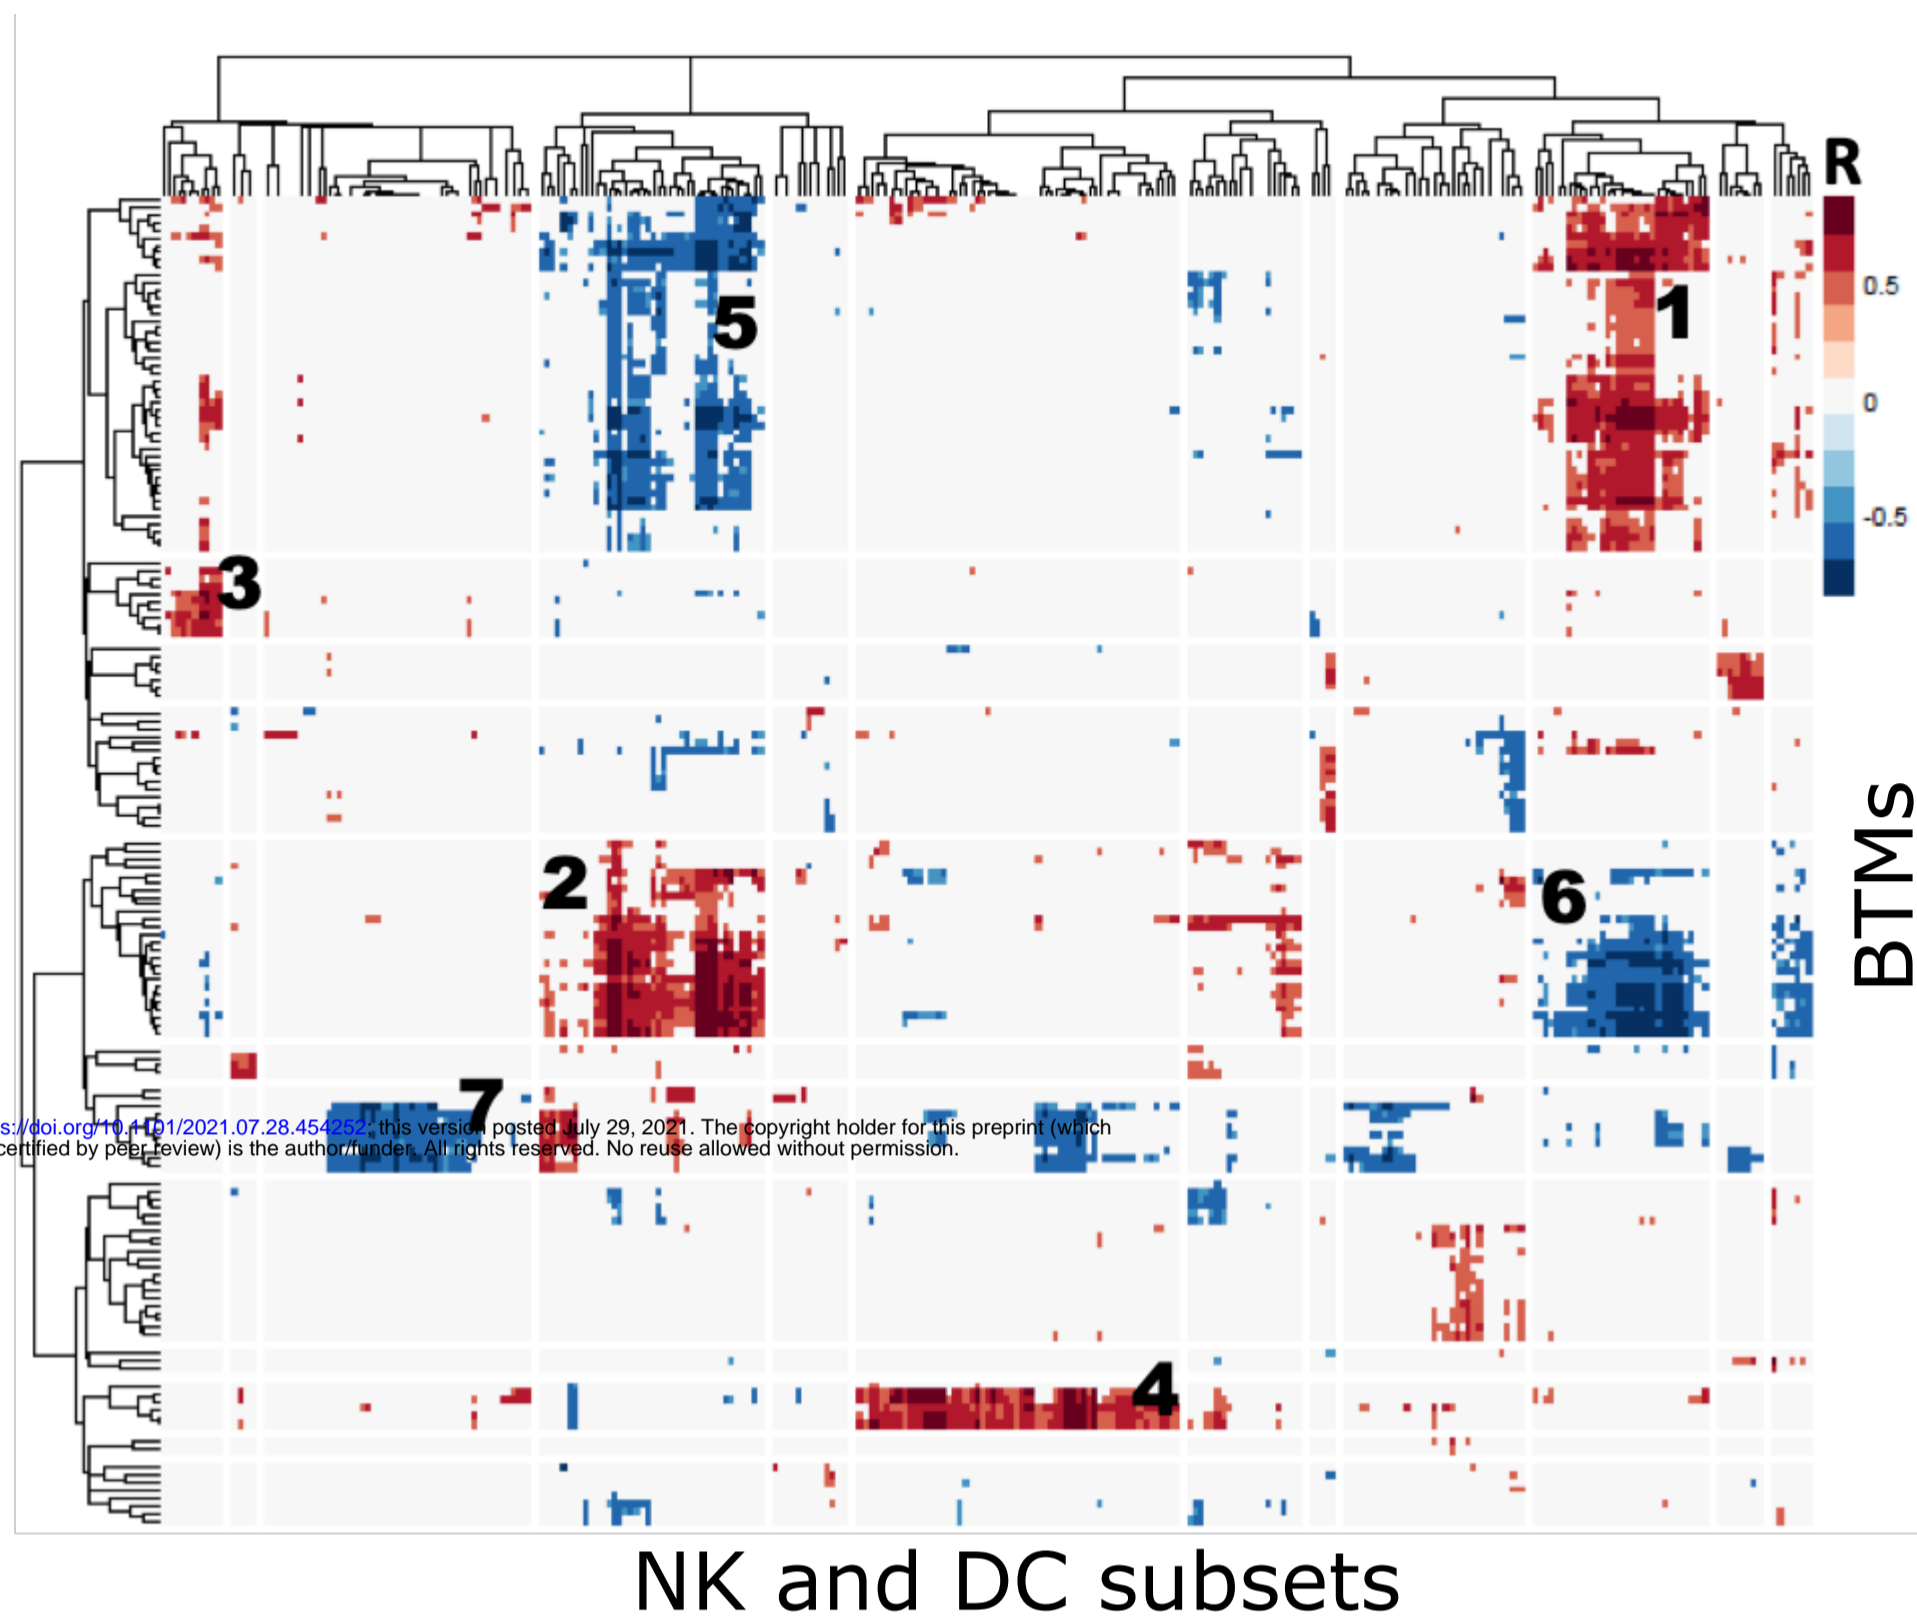

NK and DC subsets

**B****1** BTM: DC;Inflammatory response  
CELL: DC;Monocytes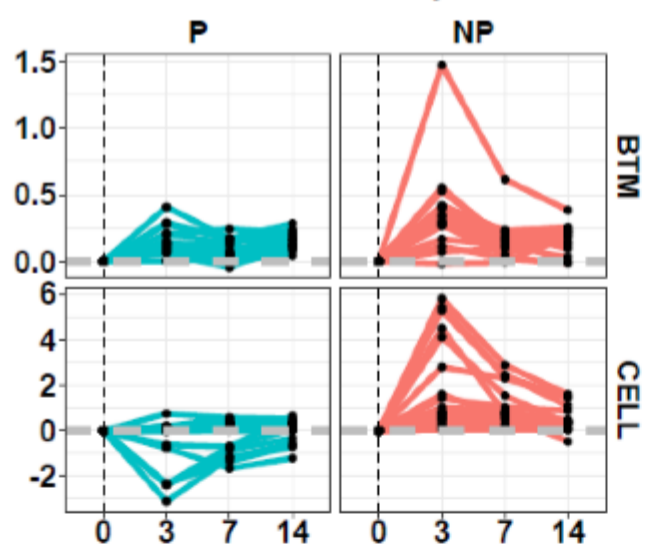

BLOCK:1

**2** BTM: T cells  
CELL: CD3 T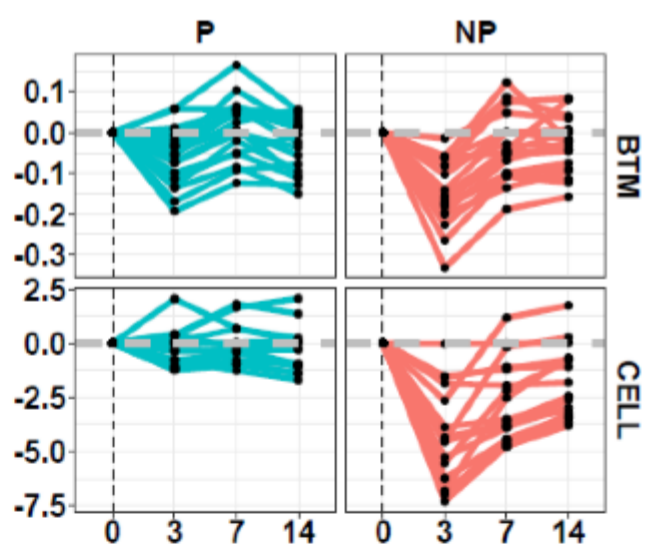

BLOCK:2

**3** BTM: Platelet activation;Monocytes  
CELL: CD38+ cells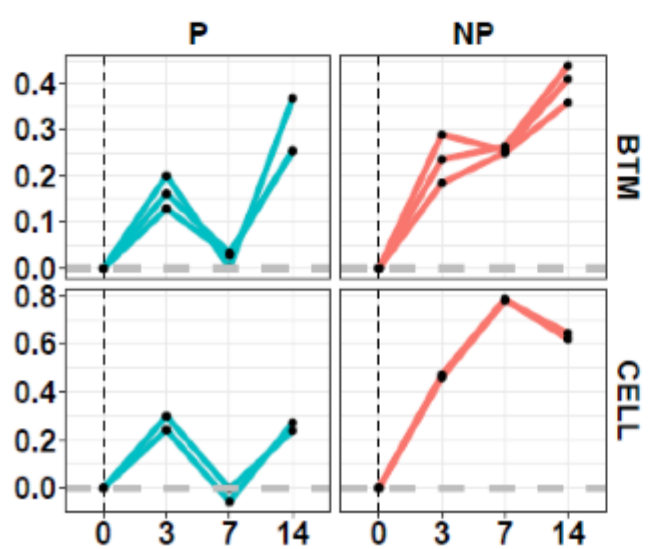

BLOCK:3

**4** BTM: NK  
CELL: NK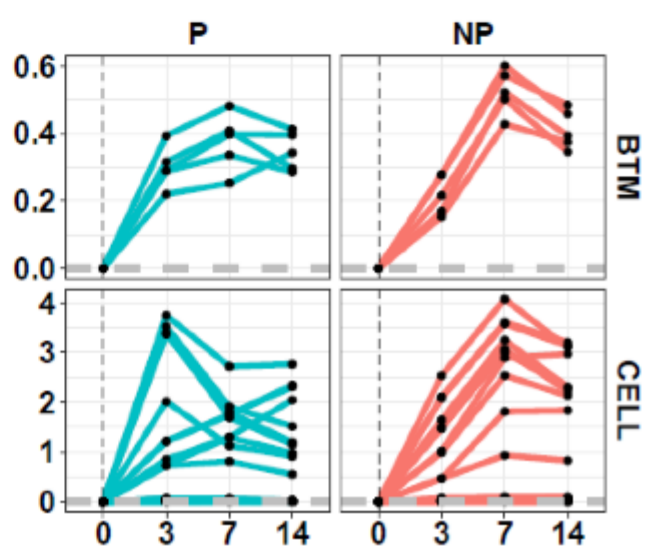

BLOCK:4

**C****5** BTM: Innate immune response;DC;Monocyte  
CELL: CD3 T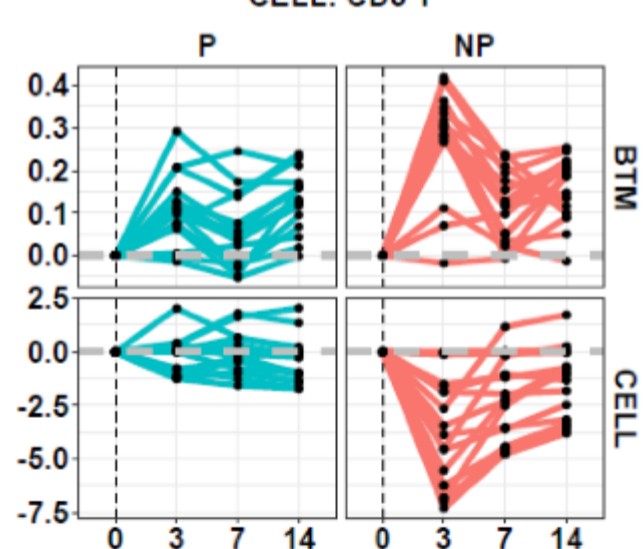

BLOCK:5

**6** BTM: T cells  
CELL: DC;Monocytes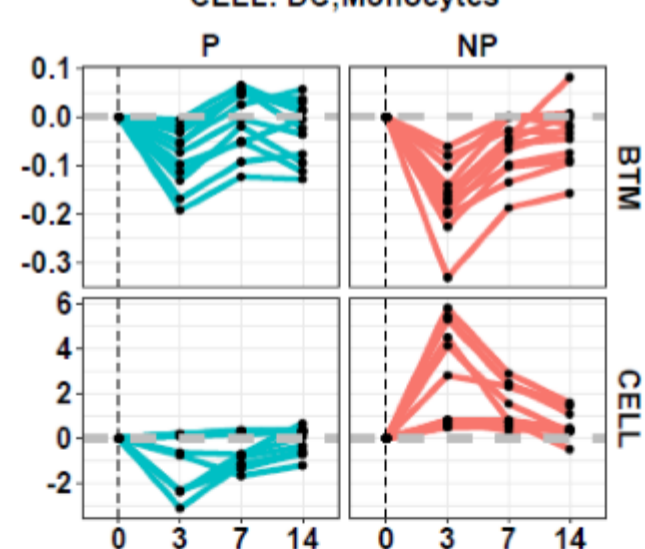

BLOCK:6

**7** BTM: B cells  
CELL: CD3+ CD56+ NK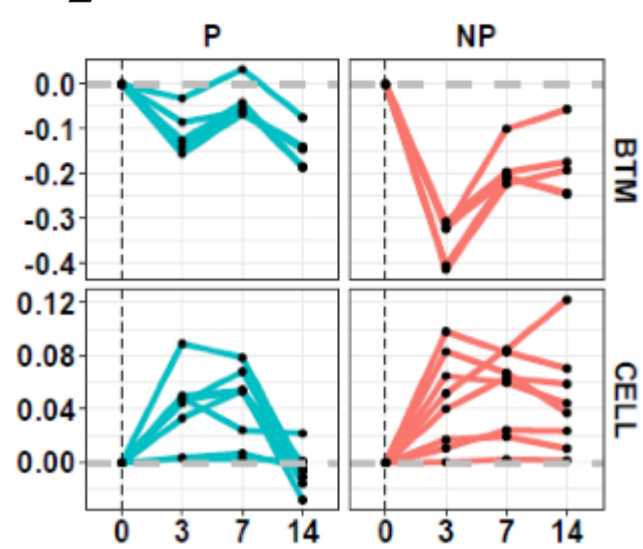

BLOCK:7

**Figure 6**

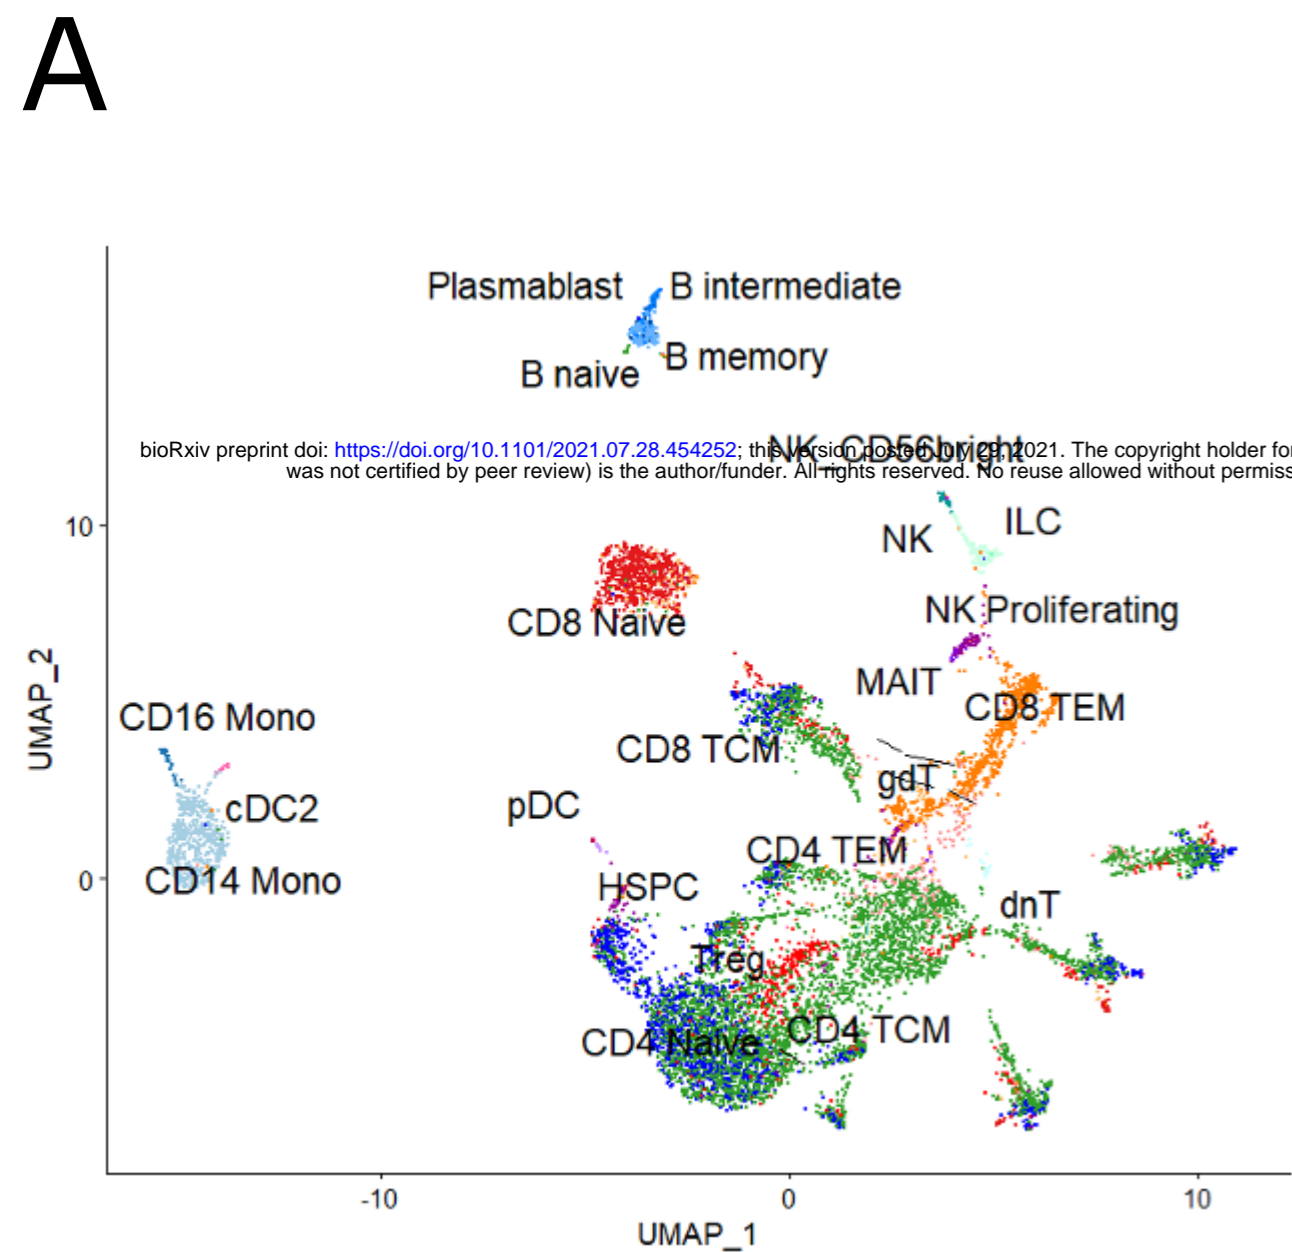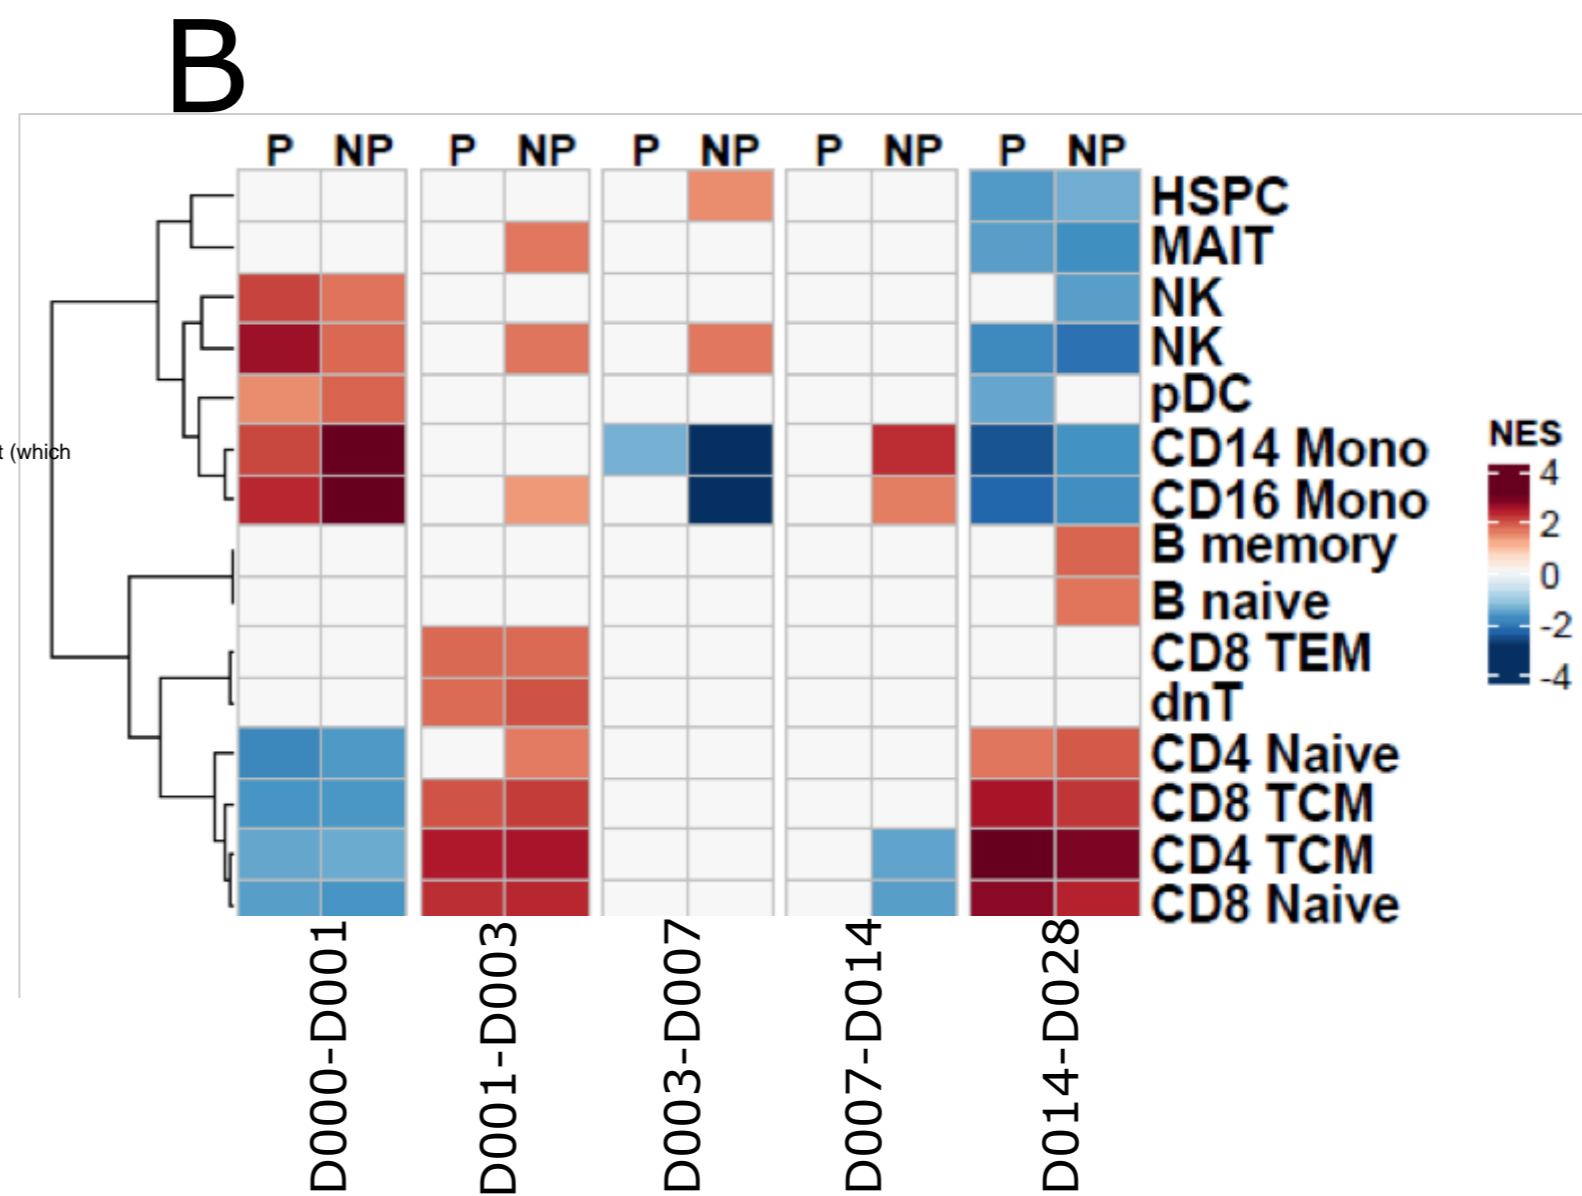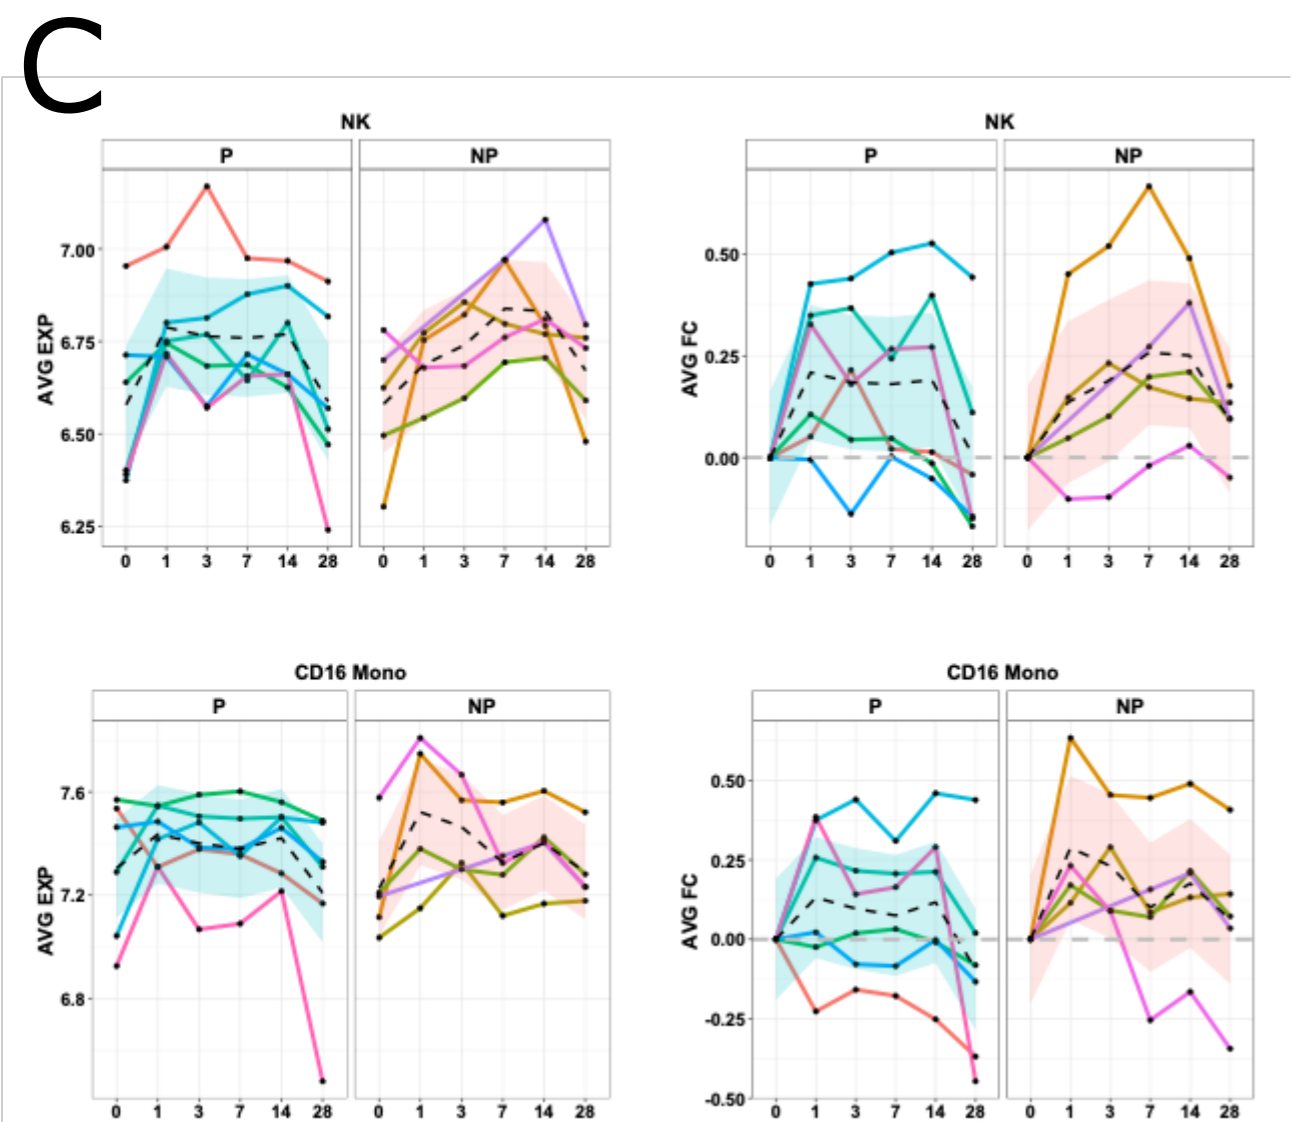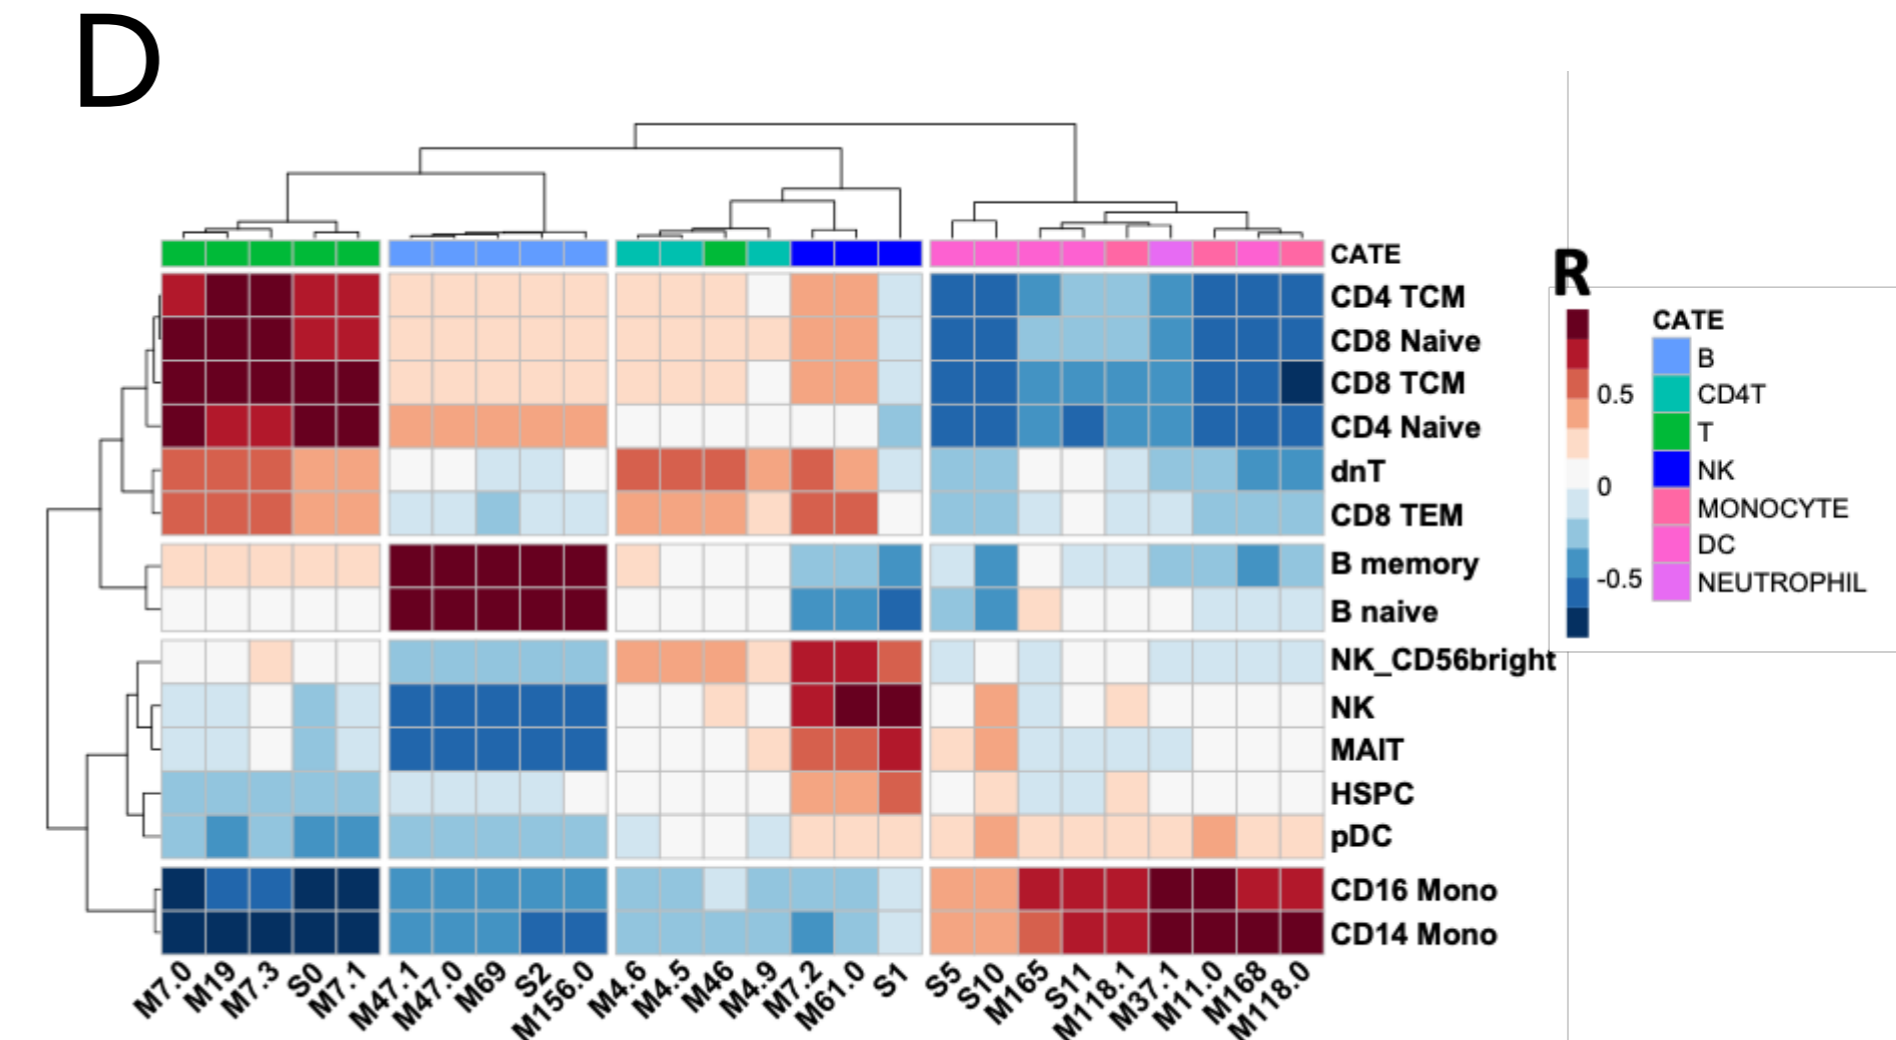

Figure 7
